# Supplementary material
Source: PubMed Central journal article supplement (PMC4901984)
Supplement: 2016150186supp.pdf [file 2016150186supp.pdf]

# The Wheel of the Mesentery:

## Imaging Spectrum of Primary and Secondary Mesenteric Neoplasms—How Can Radiologists Help Plan Treatment?

Stephanie Nougaret, MD, PhD

Yulia Lakhman, MD

Caroline Reinhold, MD, MSc

Helen C. Addley, MD

Shinya Fujii, MD, PhD

Elisabeth Delhom, MD

Boris Guiu, MD, PhD

Evis Sala, MD, PhD

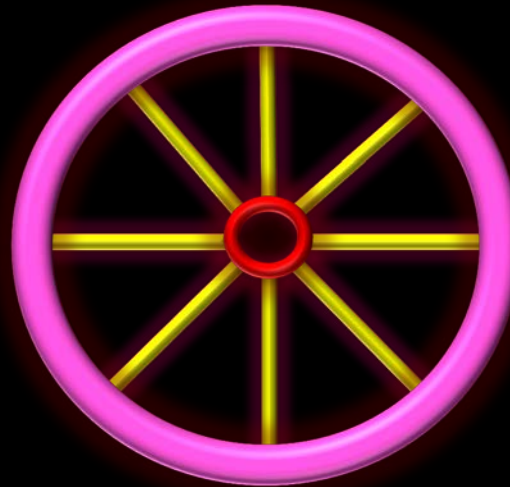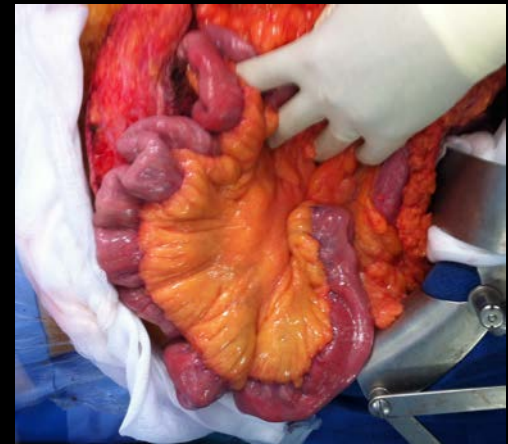

All authors have disclosed no relevant relationships. Presented as an educational exhibit at the 2014 RSNA Annual Meeting and awarded cum laude prize (educational exhibit GIE 275).

Address correspondence to S.N.: Department of Abdominal Imaging, St Eloi University Hospital, CHU Montpellier, 80 Avenue Augustin Fliche, Montpellier, 34295, France (e-mail: [stephanienougaret@free.fr](mailto:stephanienougaret@free.fr))

# Learning Objectives

- Explain the anatomy of the small bowel mesentery.
- Describe major computed tomographic (CT) and magnetic resonance (MR) imaging features of primary and secondary mesenteric lesions by using an algorithm illustrated in the presentation.
- Discuss available treatment options and describe how imaging findings may guide management.

# Introduction

- Small bowel mesentery may harbor primary mesenteric lesions and a number of secondary neoplasms.
- CT and MR imaging examinations are frequently performed for the evaluation of abdominal symptoms and may reveal mesenteric pathologic findings.
- It is important for the radiologist to be familiar with the characteristic imaging features of various mesenteric lesions, to recognize them at CT and MR imaging, to provide thoughtful differential diagnoses, and to serve as effective consultants to the referring clinicians.

## *After viewing this presentation, readers should be able to:*

- Describe the normal anatomy of small bowel mesentery.
- Discuss primary mesenteric lesions on the basis of their tissue composition and growth pattern.
- Name secondary mesenteric neoplasms according to their major route of spread.
- List key CT and MR imaging features of mesenteric lesions and describe their possible complications.
- Describe the ways in which an effective imaging report can add value and inform management decisions.

# How Can Radiologists Help Plan Treatment?

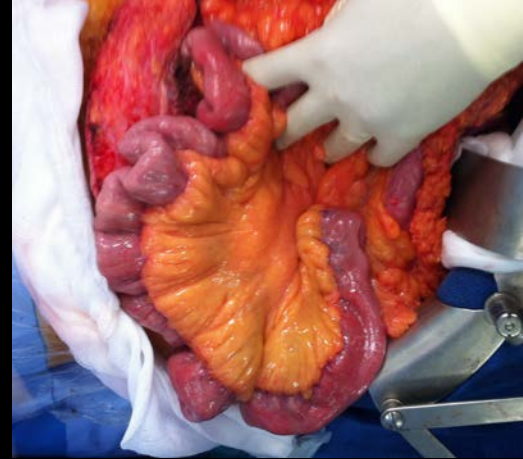

- Know the anatomy of the mesentery (ie, wheel)
- Identify primary lesions of the mesentery
- Detect secondary neoplastic involvement of the mesentery
- Diagnose tumor-related complications
- Assess tumor resectability

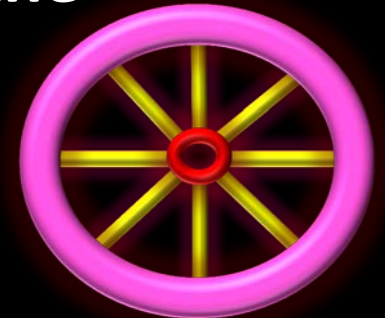

# ANATOMY OF THE WHEEL

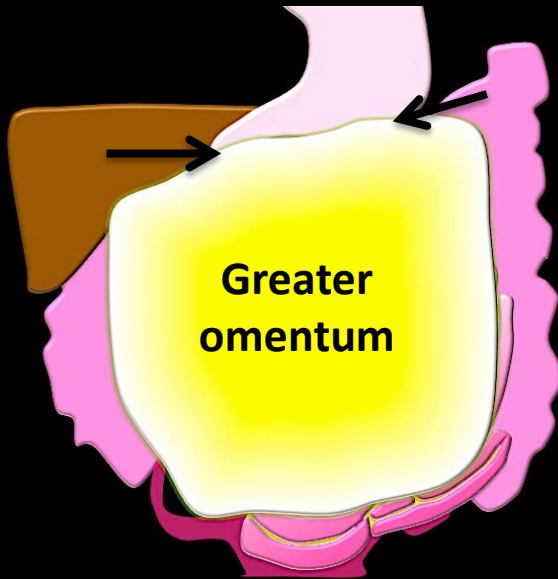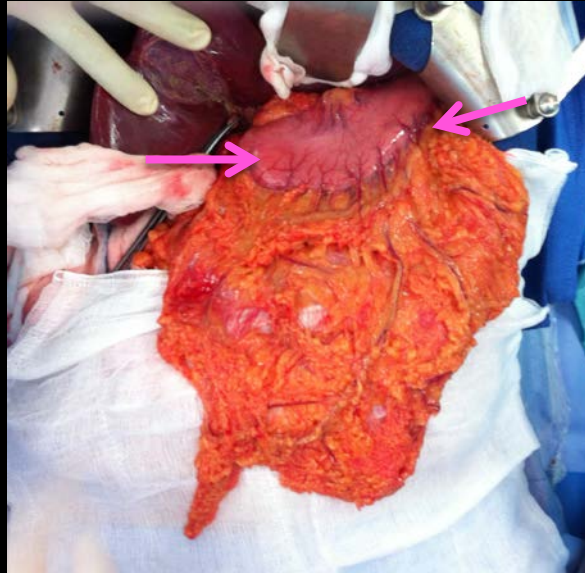

Greater omentum is the largest peritoneal fold in the body. It is suspended from the greater curvature of the stomach (black and pink arrows) and the free border of the transverse colon. Greater omentum extends down into the pelvis, covering the small intestines.

Greater omentum drapes over the small bowel and its mesentery. Small bowel mesentery is a broad fan-shaped fold of the peritoneum suspending the small intestines from the posterior abdominal wall.

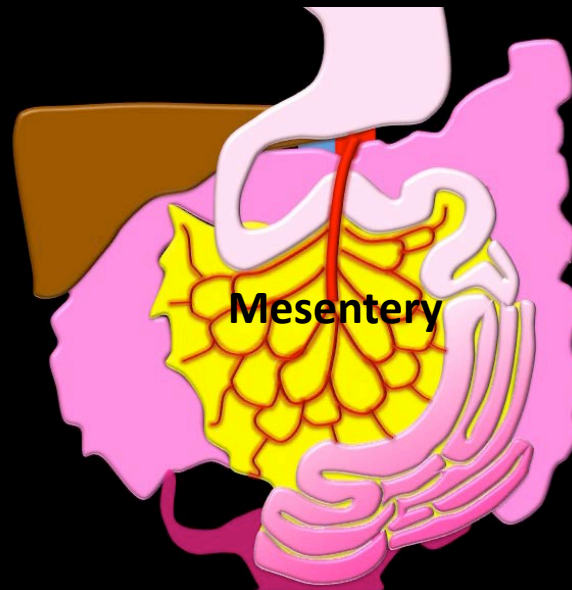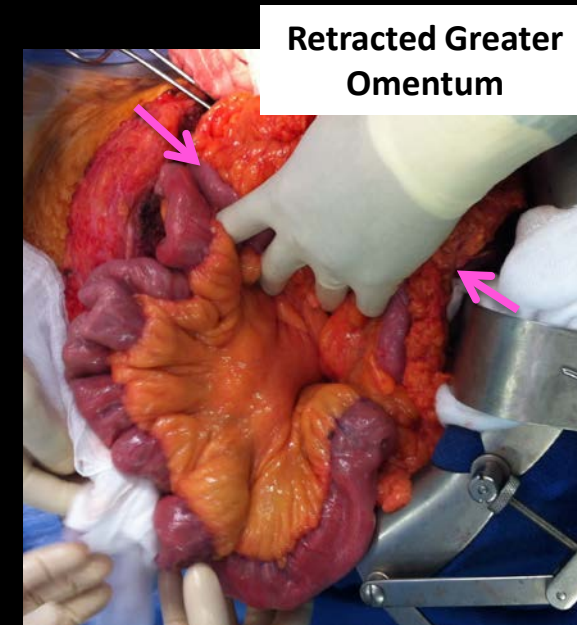

# ANATOMY OF THE WHEEL

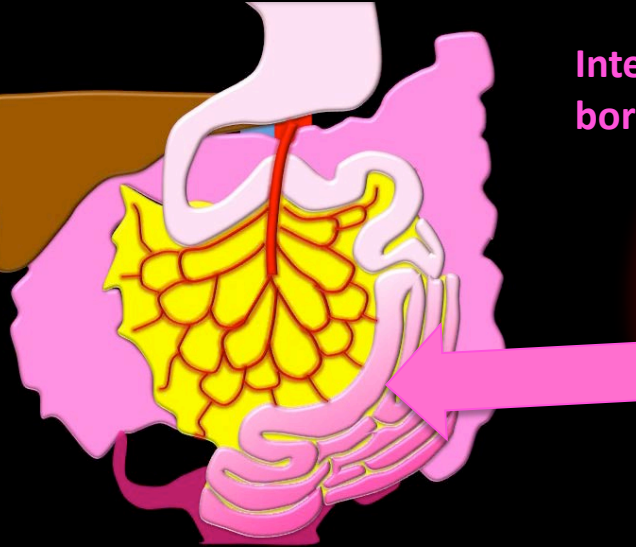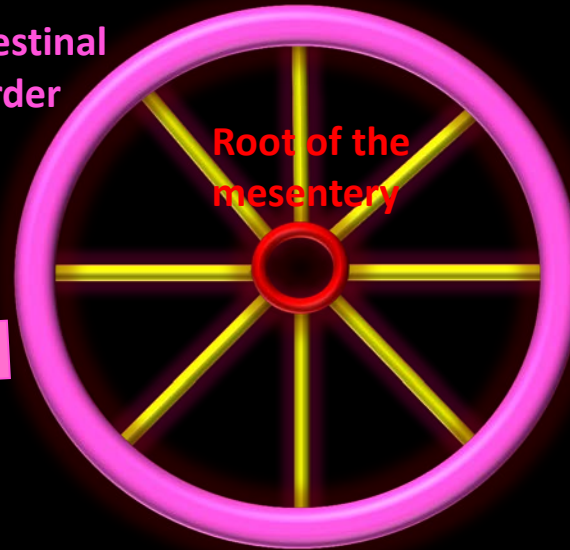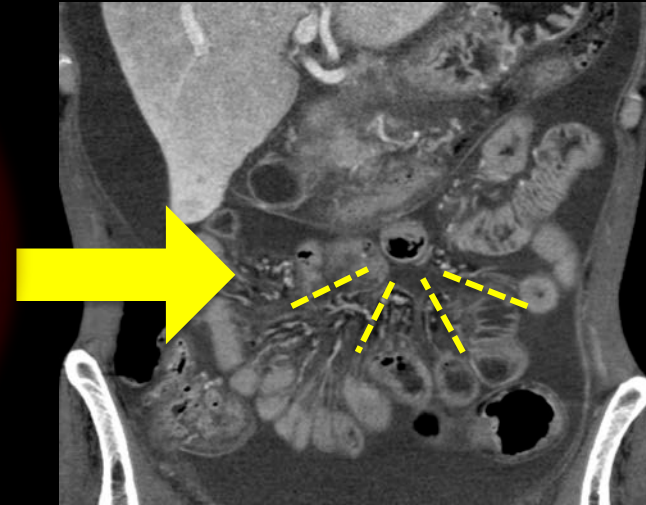

Small bowel mesentery can be represented as a wheel:

- The rim of the wheel is the small bowel.
- The spokes of the wheel are two peritoneal reflections containing fat, vessels, and lymphatic channels.
- The center of the wheel is the root of the mesentery. It contains major blood vessels and extends diagonally from the ligament of Treitz to the ileocecal valve.

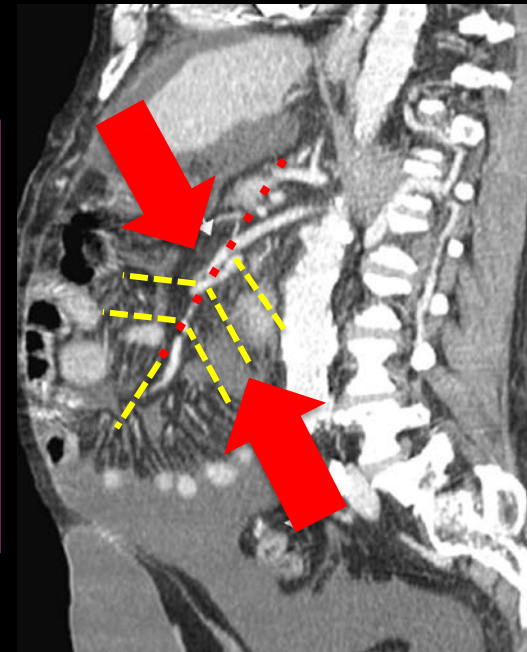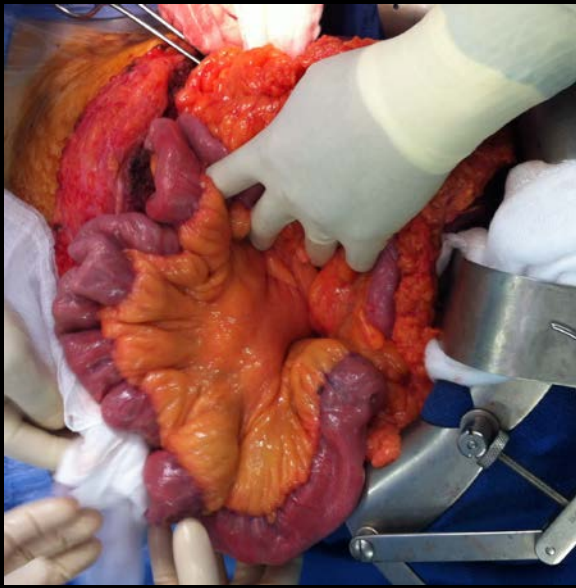

# PRIMARY MESENTERIC CONDITIONS

Primary mesenteric conditions are rare. Most are mesenchymal in origin, and the vast majority are benign.

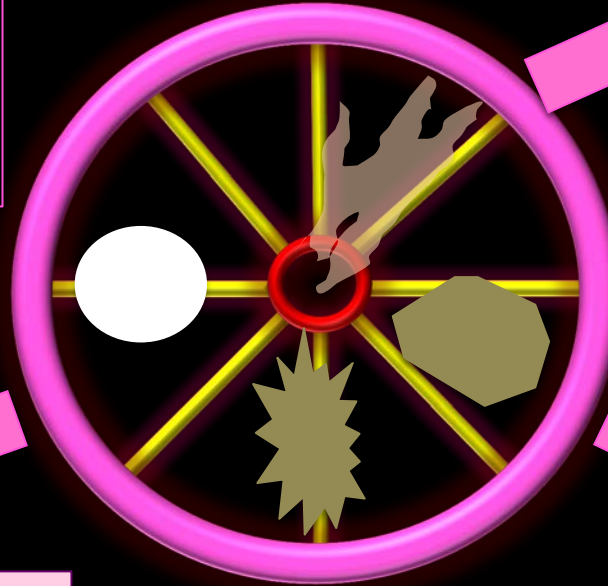

## INFILTRATIVE PATTERN

Sclerosing mesenteritis

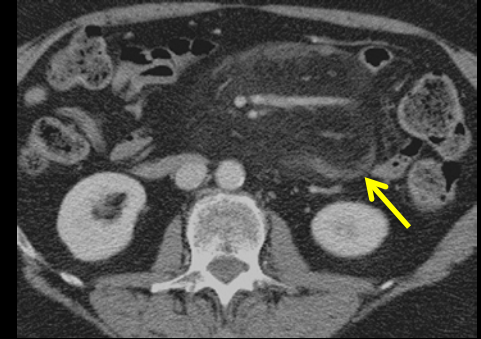

## CYSTIC PATTERN

Unilocular:

Mesothelial cyst  
Enteric cyst

Multilocular:

Lymphangioma  
Cystic mesothelioma

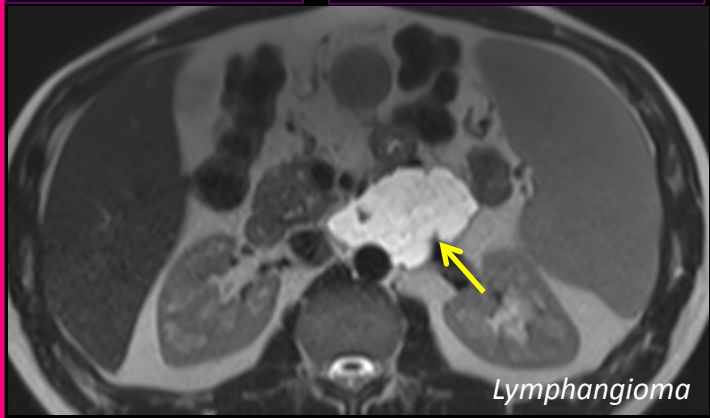

## SOLID PATTERN

Fatty content:

Lipoma  
Liposarcoma  
Lipoblastoma

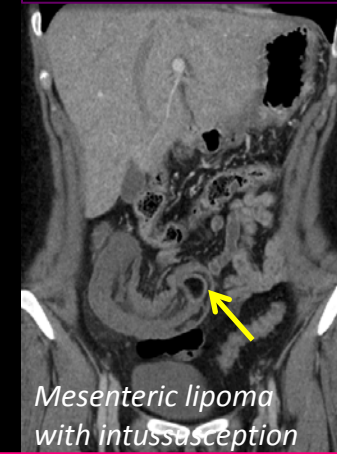

Nonfatty content:

Desmoid tumor  
Lymphoma  
Gastrointestinal stromal tumor (GIST)  
Solitary fibrous tumor  
Mesothelioma

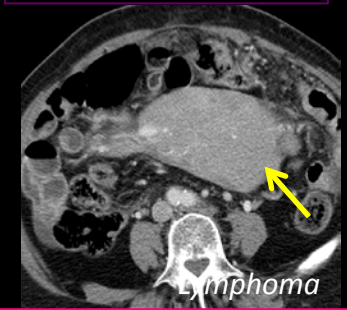

## STELLATE PATTERN

Sclerosing mesenteritis  
Carcinoid

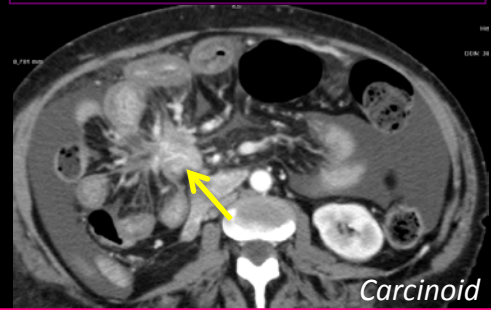

# Solid Pattern: Desmoid Tumor

Desmoid tumors are rare. They arise from benign but locally aggressive fibroblastic proliferations. Although desmoid tumors can develop anywhere in the abdomen, common locations include surgical scars and small bowel mesentery. In fact, 75% of desmoid tumors develop in patients with prior abdominal surgeries. Patients with familial adenomatous polyposis (ie, Gardner syndrome) are also at increased risk for the development of these tumors.

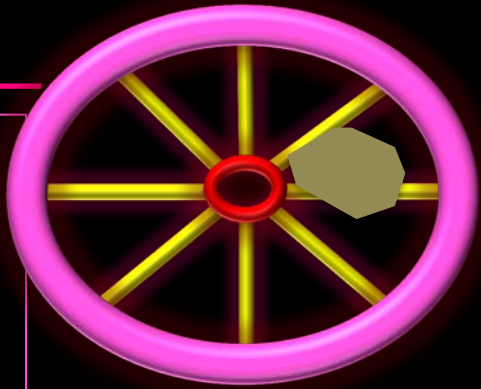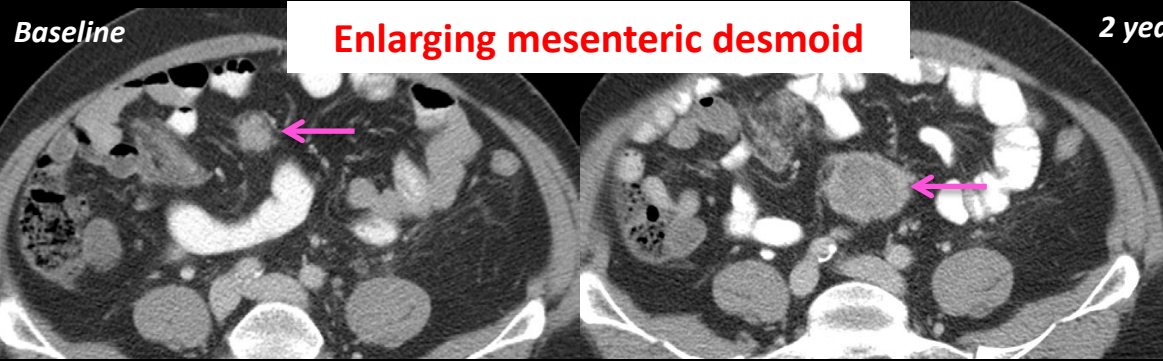

At CT, mesenteric desmoids appear as soft-tissue masses with either well-demarcated or poorly defined borders.

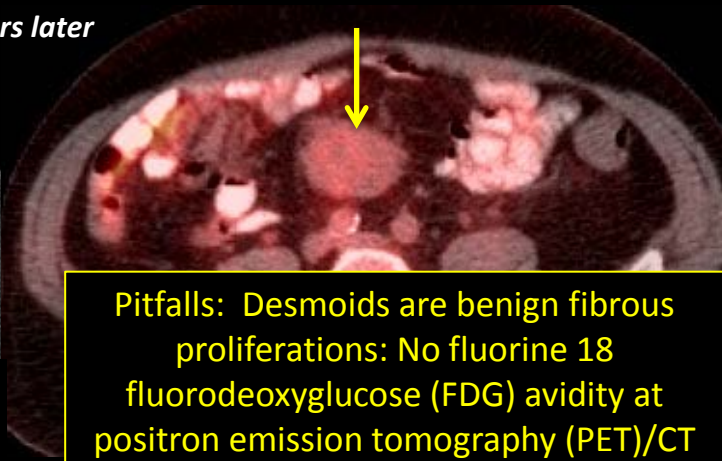

Pitfalls: Desmoids are benign fibrous proliferations: No fluorine 18 fluorodeoxyglucose (FDG) avidity at positron emission tomography (PET)/CT and no restriction at diffusion-weighted (DW) imaging.

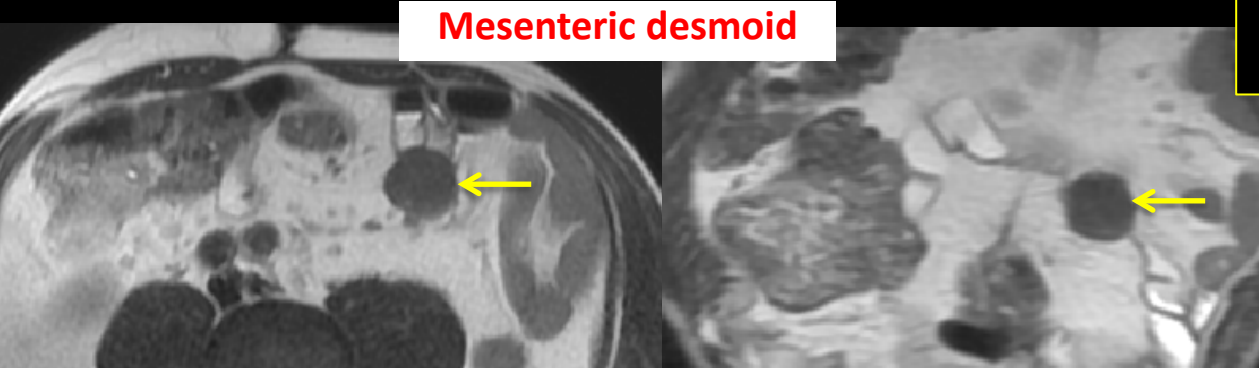

At MR imaging, desmoid tumors have variable signal intensity (SI) on T2-weighted images that depends on their cellularity (typically low T2 SI).

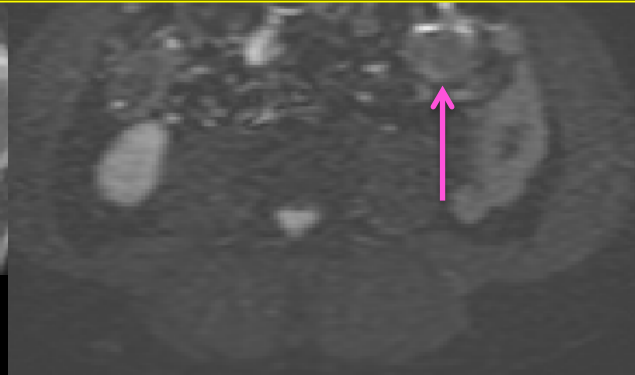



# Solid Pattern: Lipoma

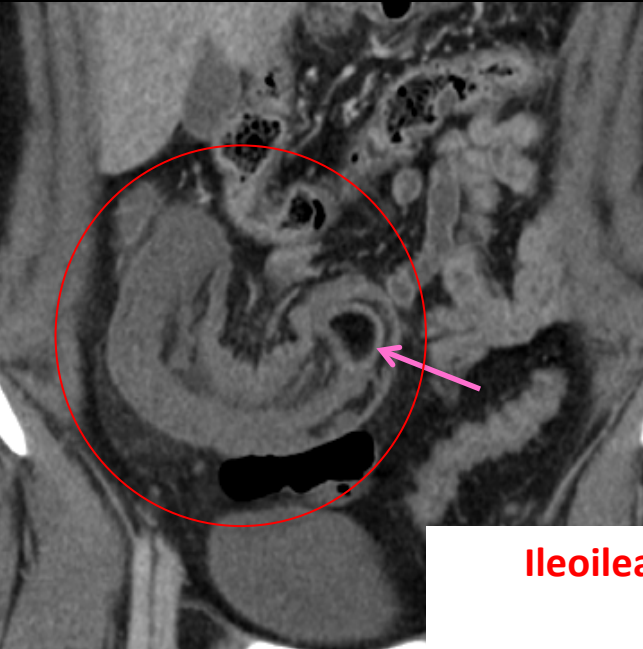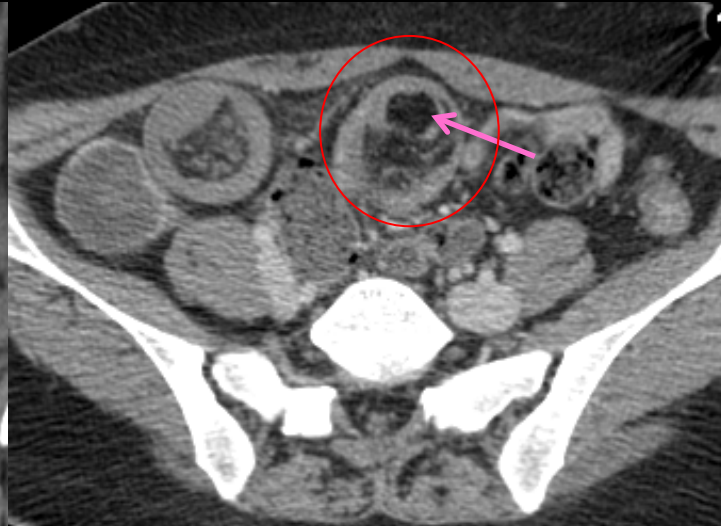

**Ileoileal intussusception caused by a small mesenteric lipoma**

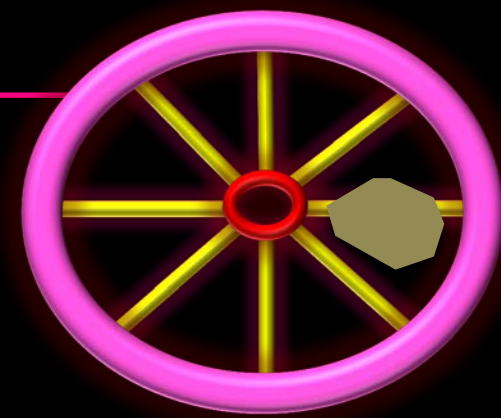

Rare  
Mean age: 40–60 years  
Typical location: Ileal mesentery

- Most mesenteric lipomas are asymptomatic. Occasionally, symptoms may develop in the setting of enteric intussusception or volvulus.
- At CT, mesenteric lipoma appears as a homogeneous fat-attenuation mass with no contrast enhancement. A surrounding capsule may be seen.
- Differential diagnosis includes lipoblastoma (if patient is a young child) or well-differentiated liposarcoma (if patient is an adult). Lipoma and well-differentiated liposarcoma cannot be distinguished at imaging. Tissue diagnosis may be required.

**Large mesenteric lipoma**

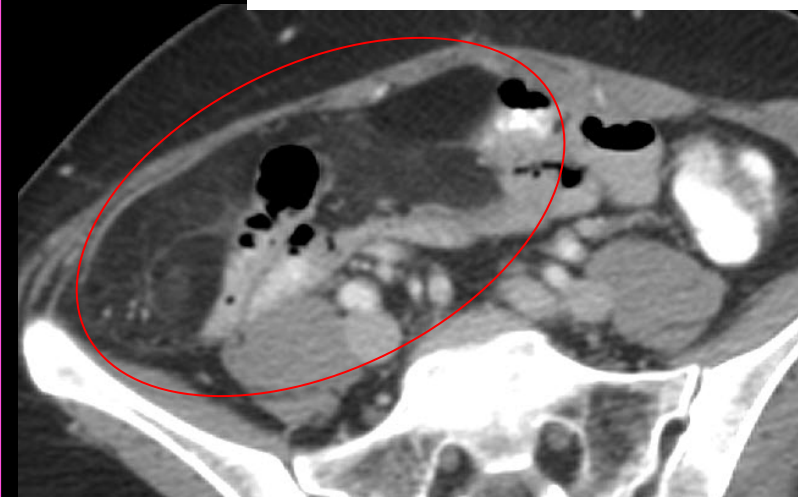

# Solid Pattern: Lipoblastoma

Lipoblastoma is a rare benign childhood tumor (age <3 years) composed of embryonic fat. Fewer than 10% of lipoblastomas occur in the abdomen, with most tumors affecting the limbs or trunk. Abdominal lipoblastomas are most commonly found in the retroperitoneum, with fewer than 15% of reported cases observed in small bowel mesentery.

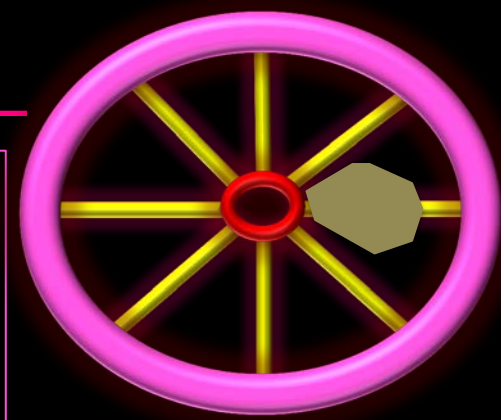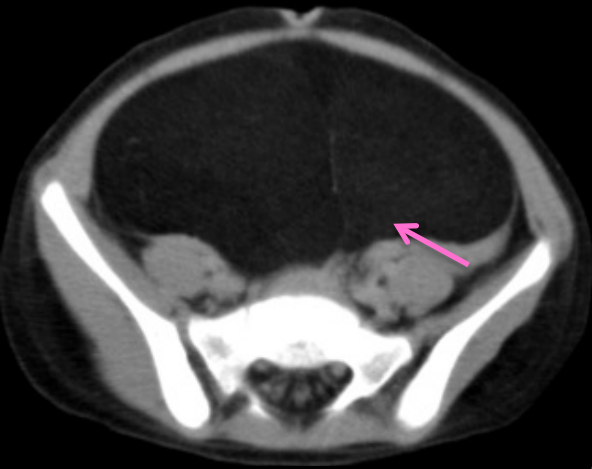

At CT, the tumor is purely fat in attenuation and has subtle lobulations.

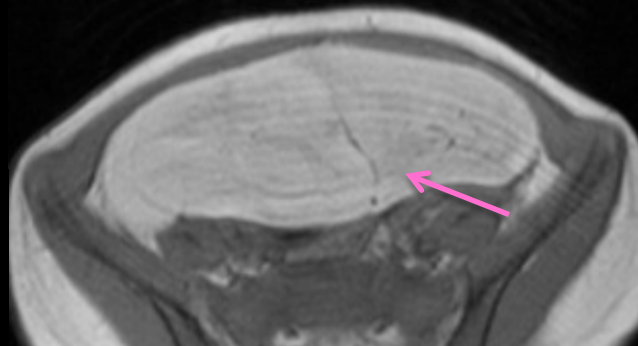

T1-weighted: Hyperintense and has the same SI as the nearby subcutaneous fat

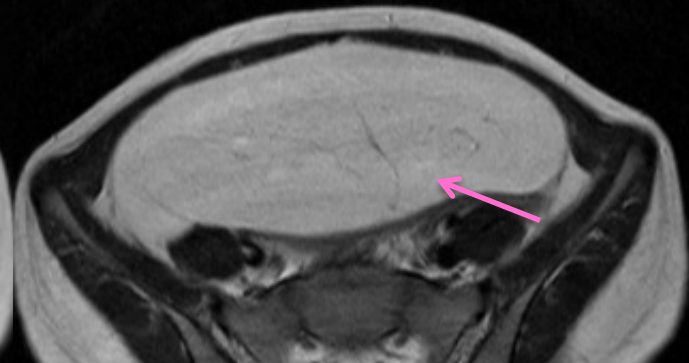

T2-weighted: Hyperintense and has the same SI as the nearby subcutaneous fat

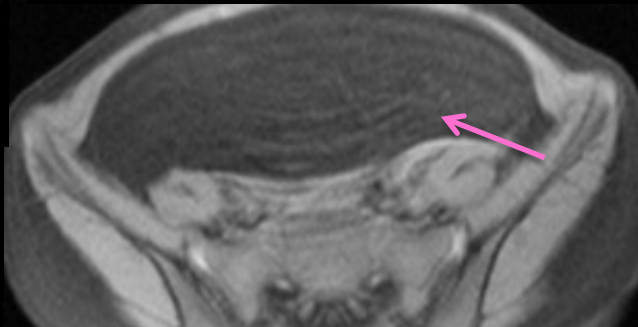

T-1 weighted fat-saturated: Diffuse signal drop with fat saturation

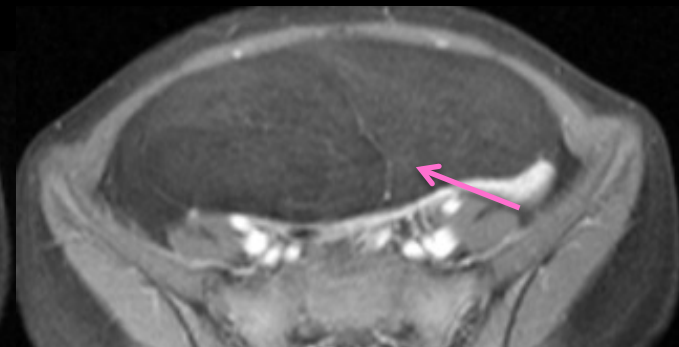

T1-weighted + gadolinium-based agent: No enhancement after intravenous administration of contrast material

# Solid Pattern: Sarcoma

Mesenteric sarcomas are rare, and liposarcoma is the most common subtype of mesenteric sarcoma. The mesenteric origin can be hard to assess in large sarcomas.

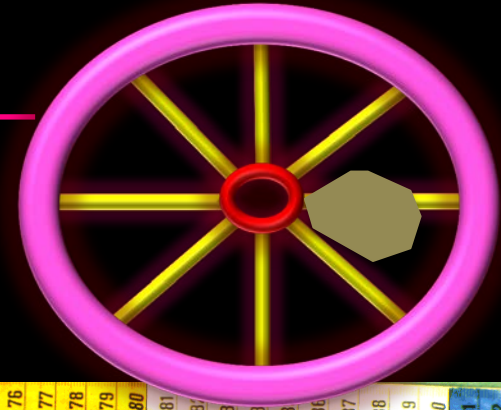

## Myxoid liposarcoma

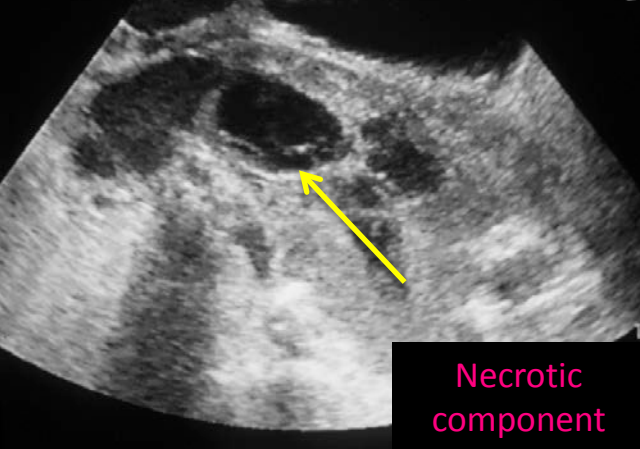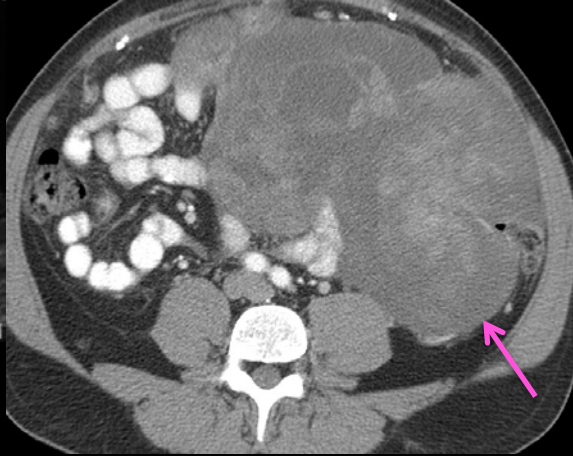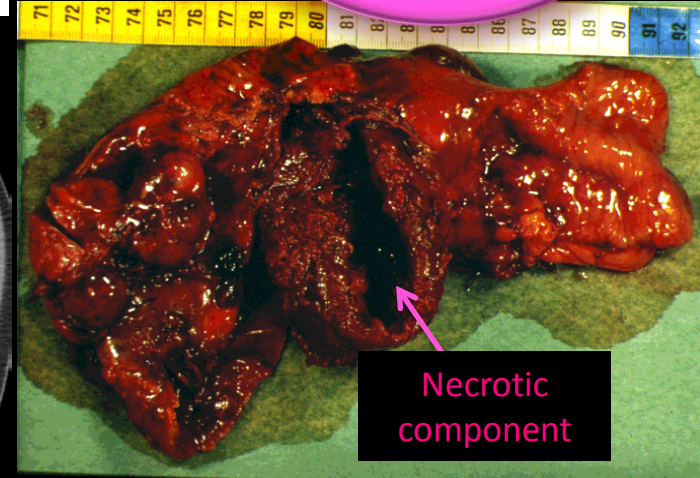

## Dedifferentiated Liposarcoma

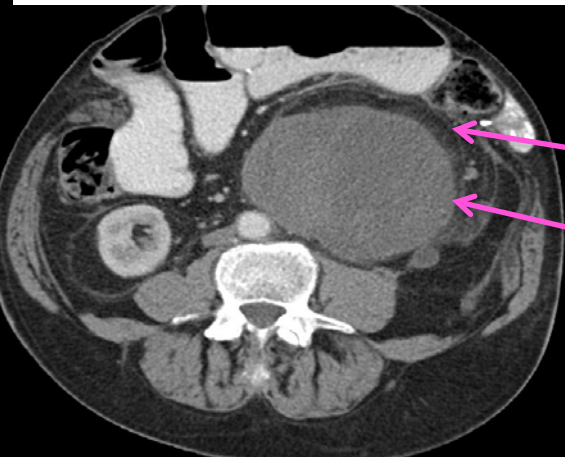

- Large mesenteric tumor with two distinct components:
- Fatty component consistent with well-differentiated portion
  - Soft-tissue component consistent with dedifferentiated portion

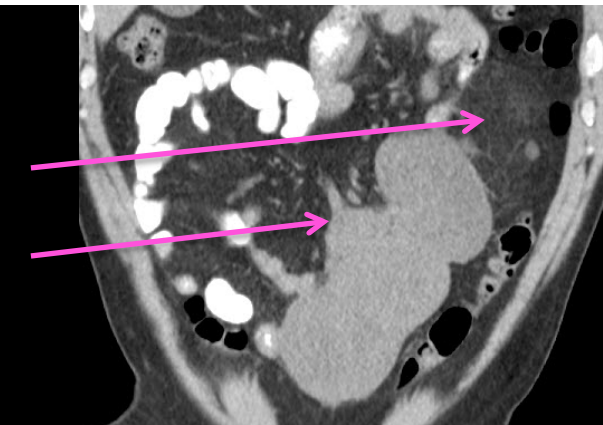

# Cystic Pattern: Lymphangioma

Lymphangiomas are uncommon benign lymphatic proliferations that manifest as thin-walled cystic masses. Lymphangiomas typically present during childhood. Although they can occur anywhere in the body, these lesions are often found in the neck. The most common site of abdominal lymphangiomas is the mesentery. Mesenteric lymphangiomas are usually asymptomatic but may cause intestinal obstruction or volvulus.

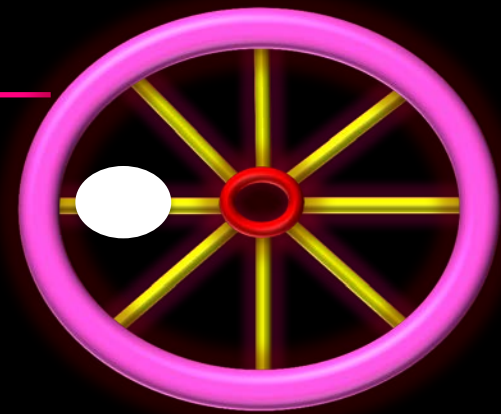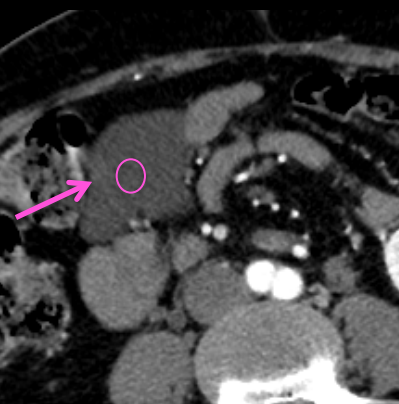

At CT, lymphangioma appears as a lobulated fluid-attenuation mass.

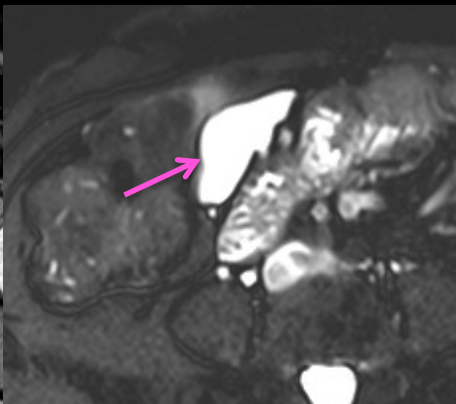

At MR imaging, lymphangioma is a lobulated fluid-SI nonenhancing mass (hypointense on T1-weighted and hyperintense on T2-weighted images, with a thin enhancing wall on postcontrast images).

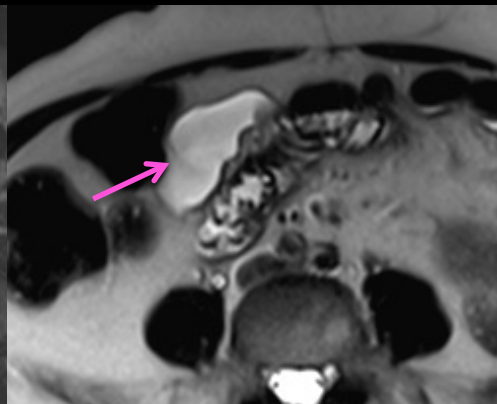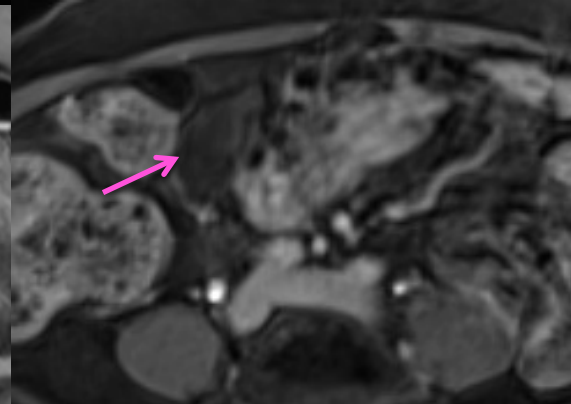

**Pitfalls:** When found in the root of the mesentery, lymphangiomas may be mistaken for enlarged lymph nodes. This mistake can be avoided by measuring the attenuation value of the mass.

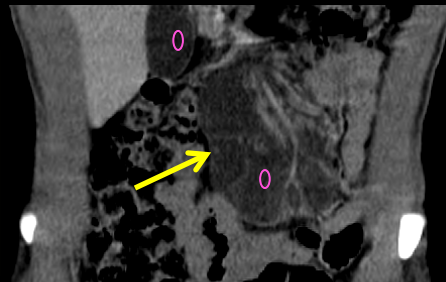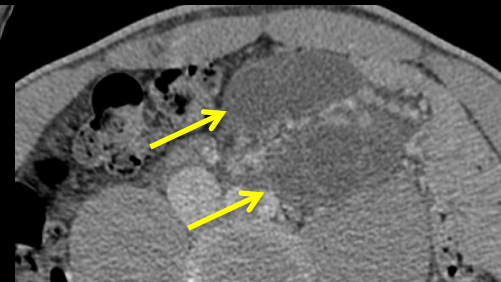

Fluid-attenuation mesenteric mass with attenuation similar to that of the gallbladder.

# Stellate Pattern: Carcinoid

Primary mesenteric carcinoid is rare, but secondary mesenteric involvement is common. Carcinoid tumors usually originate in the small intestine and spread to the adjacent mesentery. The primary intestinal tumor is often not identified because of its small size. Because mesenteric tumor spread is the dominant imaging finding of carcinoid tumors, they are included in the present discussion.

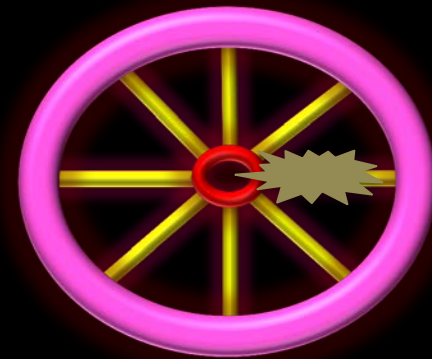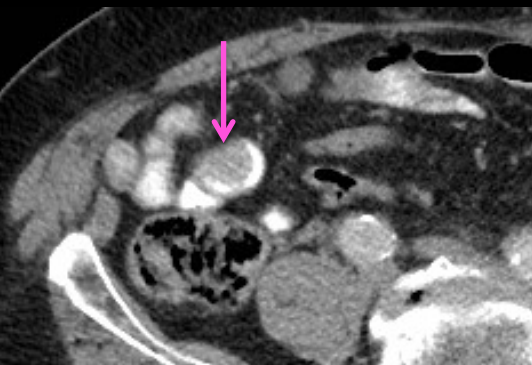

**Small primary tumor**

Mesenteric masses caused by carcinoid tumors often have a **spoke-wheel** or **sunburst** appearance due to mesenteric fibrosis and desmoplastic reaction. In addition, up to 70% of lesions contain calcifications.

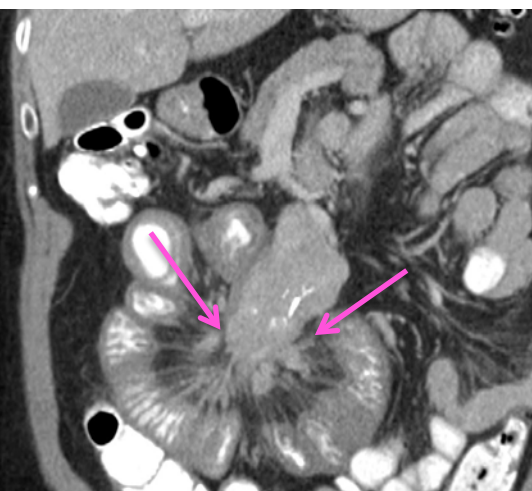

**Spoke-wheel or sunburst pattern**

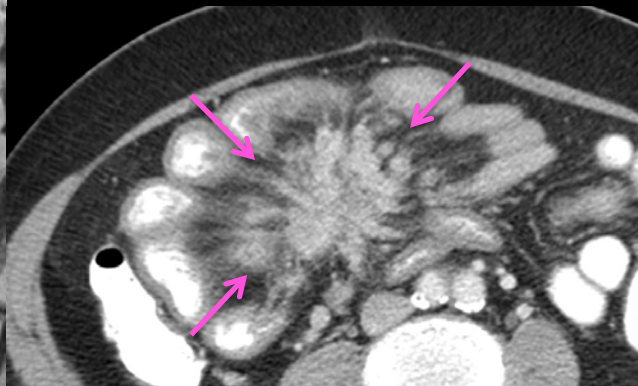

Carcinoids may produce a kink of the intestinal wall known as a **hairpin turn**. The kinking is the result of tumor infiltration and fibrosis.

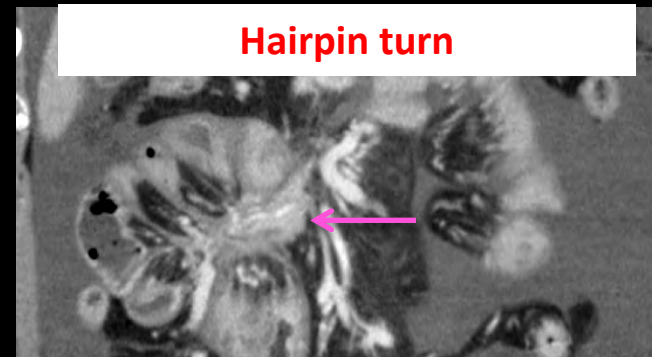

**Hairpin turn**

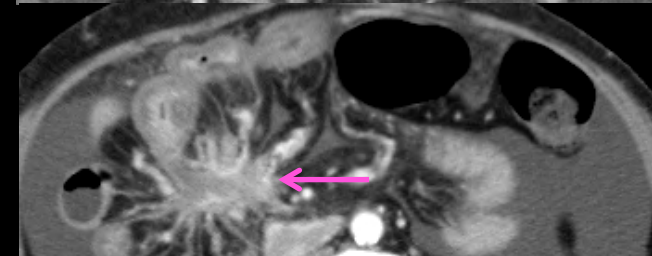

# Infiltrative Pattern: Sclerosing Mesenteritis

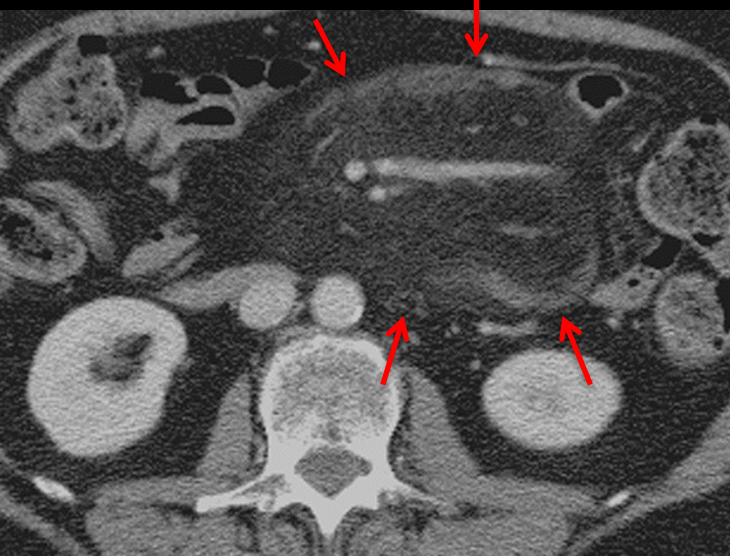

Sclerosing mesenteritis is a rare condition of unknown cause characterized by chronic mesenteric inflammation and fibrosis. It typically involves small bowel mesentery, especially its root. The CT appearance is variable, ranging from a subtle increase in attenuation of the mesentery to a soft-tissue mass.

**Mesenteric panniculitis** is a subgroup of sclerosing mesenteritis in which chronic mesenteric inflammation is a predominant feature. At CT, mesentery may have increased attenuation, with small lymph nodes and surrounding pseudocapsule.

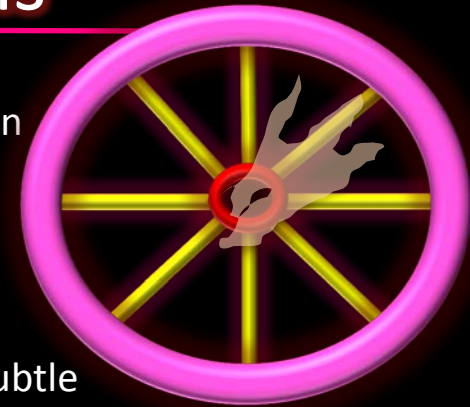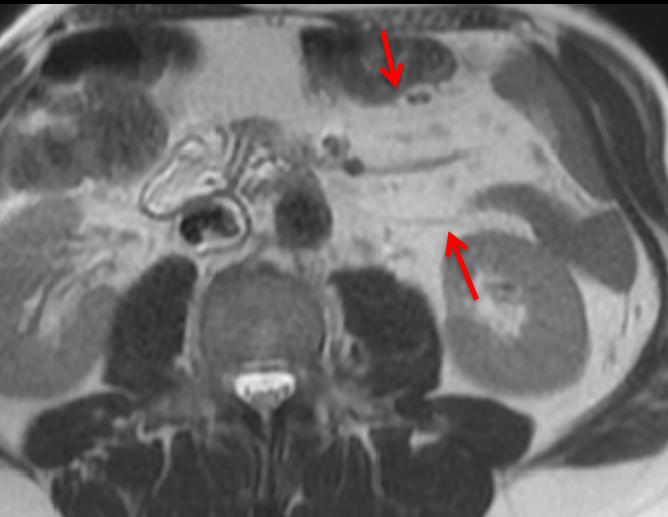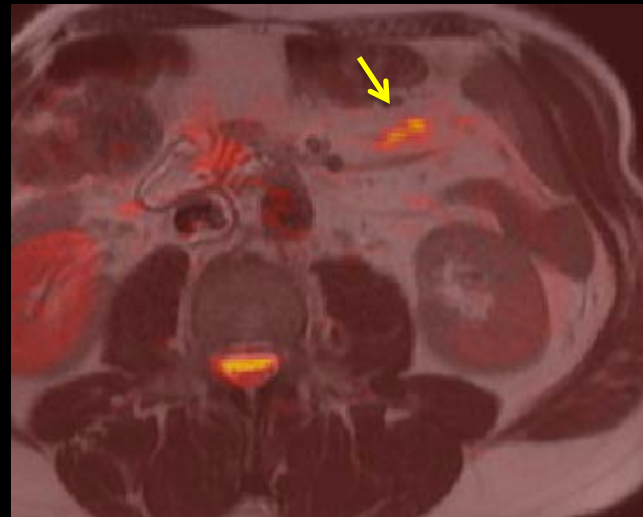

At MR imaging, pseudocapsule and small lymph nodes are easily detected on T2-weighted images.

**Pitfall:** On DW images, lymph nodes demonstrate restricted diffusion. DW imaging is not useful to distinguish benign from pathologic lymph nodes. However, it does help with lymph node detection.

The chronic form of sclerosing mesenteritis in which fibrosis predominates is known as **retractile mesenteritis**. CT typically demonstrates a soft-tissue mass that may contain central **calcifications** due to fat necrosis. At imaging, retractile mesenteritis may be indistinguishable from lymphoma or desmoid and may require excisional biopsy to establish definitive diagnosis.

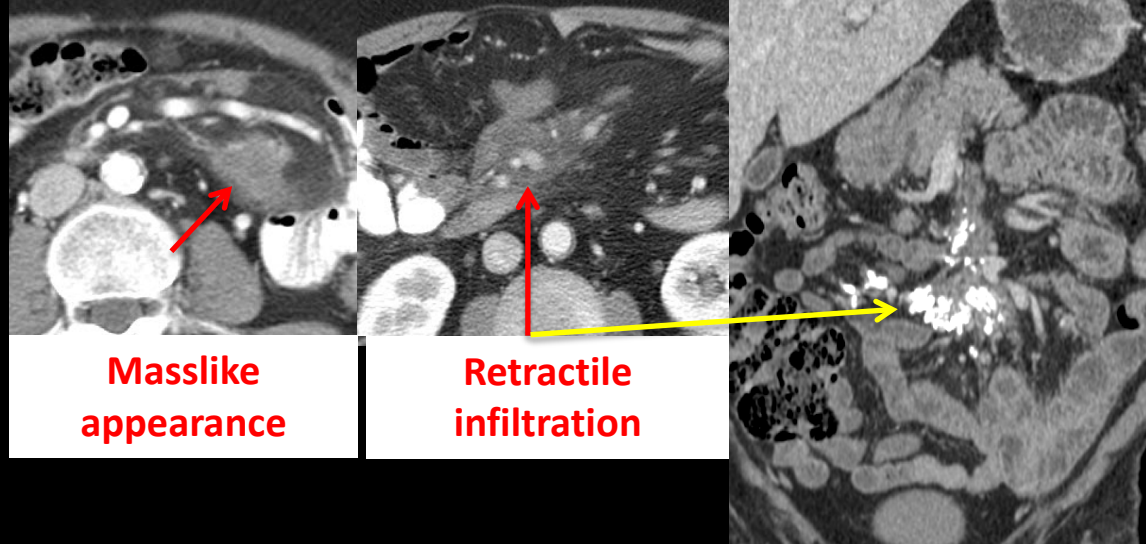

**Masslike appearance**

**Retractile infiltration**

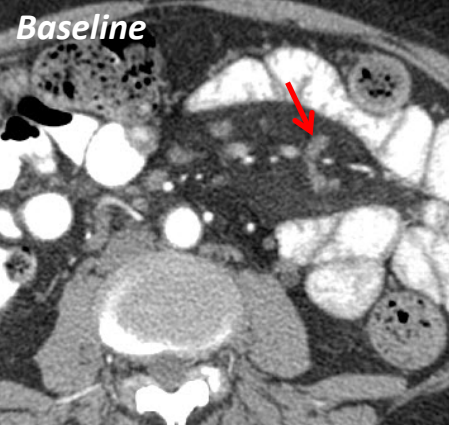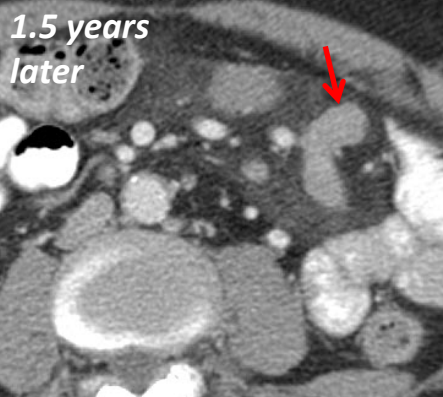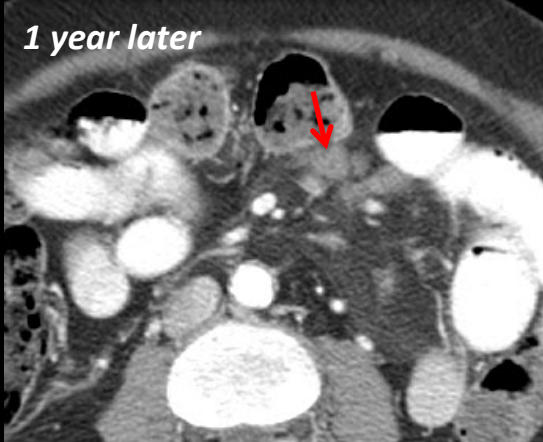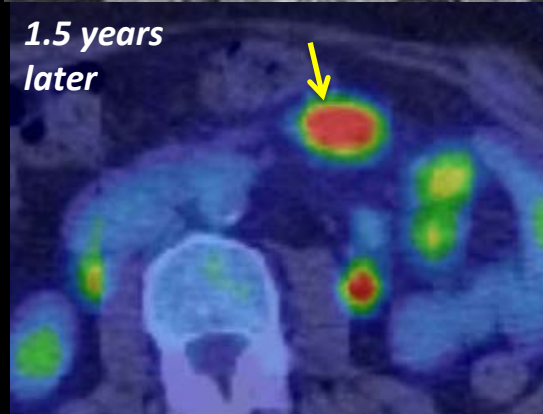

*Baseline*

*1 year later*

*1.5 years later*

*1.5 years later*

**Sclerosing mesenteritis** may be observed in association with an immunoglobulin G4-related sclerosing disease. In addition to the mesentery, affected organs may include the pancreas, bile ducts, gallbladder, kidneys, retroperitoneum, thyroid, lacrimal glands and orbits, salivary glands, lymph nodes, lungs, gastrointestinal tract, and blood vessels. Sclerosing mesenteritis may also coexist with several malignancies, including lymphoma.

Images in a 63-year-old man with sclerosing mesenteritis demonstrate progressive enlargement of the mesenteric lymph nodes and marked FDG avidity at PET/CT. Subsequent biopsy finding was consistent with lymphoma.

# PATTERNS OF SECONDARY NEOPLASMS

*Small bowel adenocarcinoma*

**DIRECT EXTENSION**

**LYMPHATIC SPREAD**

*Metastatic nodes from colon cancer*

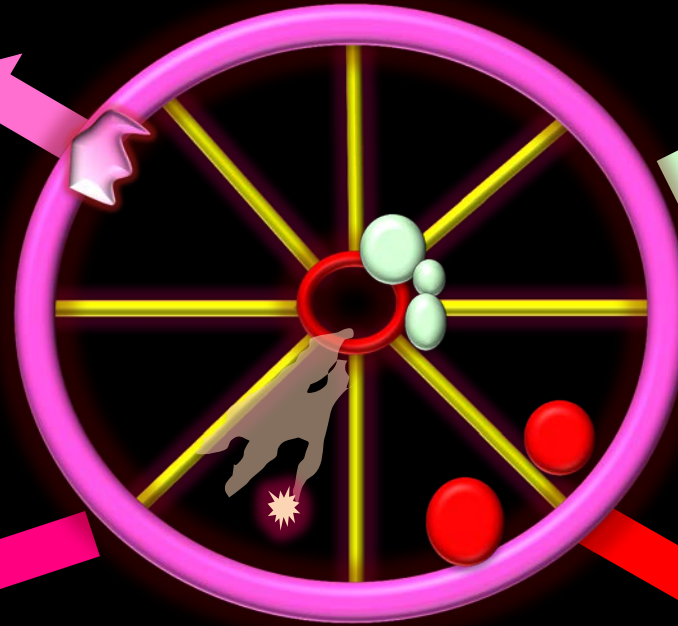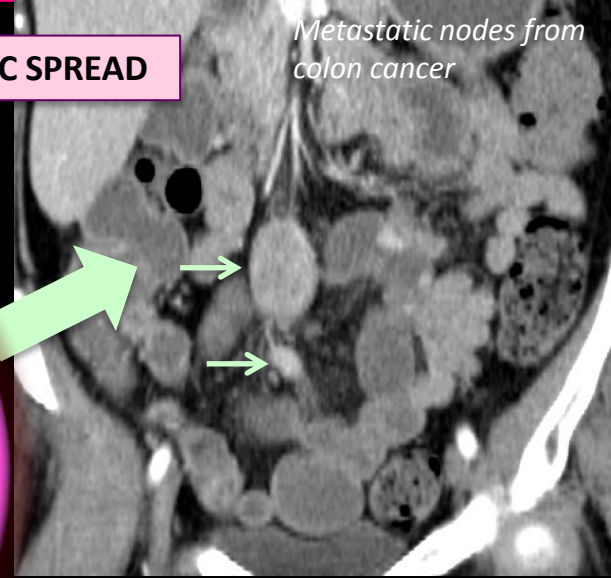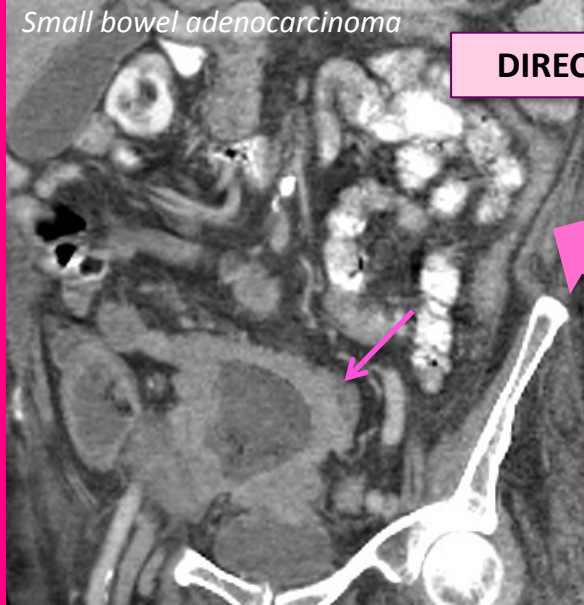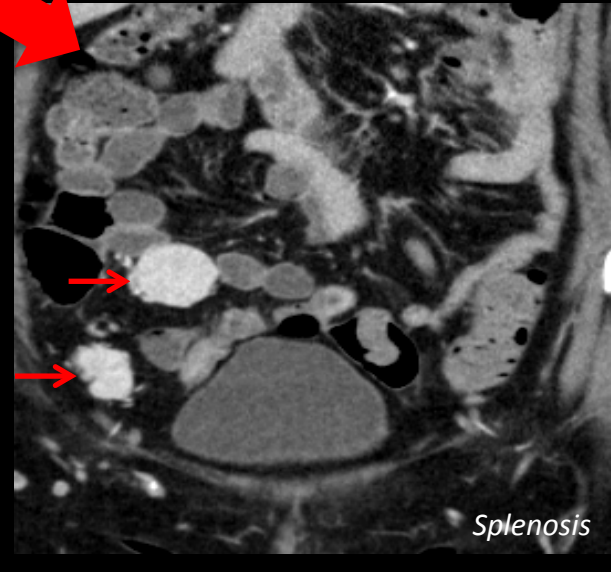

**HEMATOGENOUS SPREAD**

*Splenosis*

**PERITONEAL SEEDING**

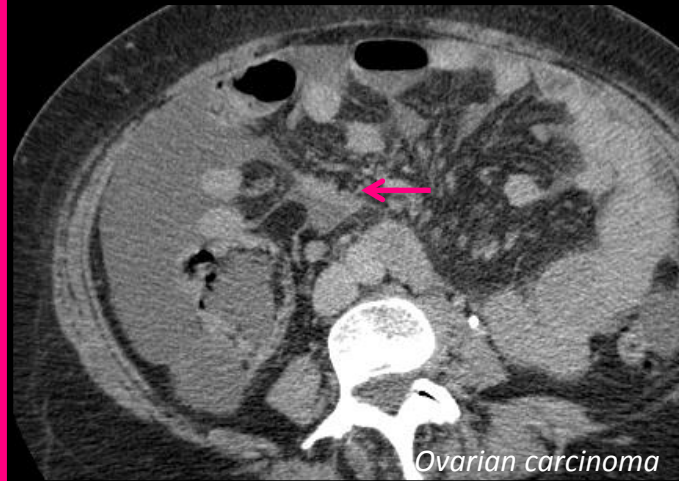

*Ovarian carcinoma*



# Direct Tumor Spread

Several abdominal malignancies, such as biliary, pancreatic, gastric, and colon cancers, may invade directly into the mesentery or spread along the mesenteric vessels.

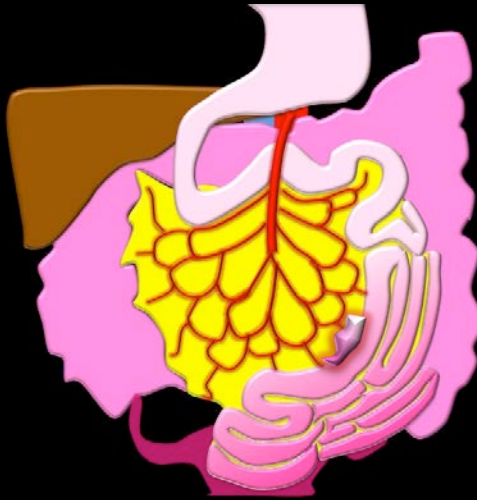

**Small bowel adenocarcinoma**

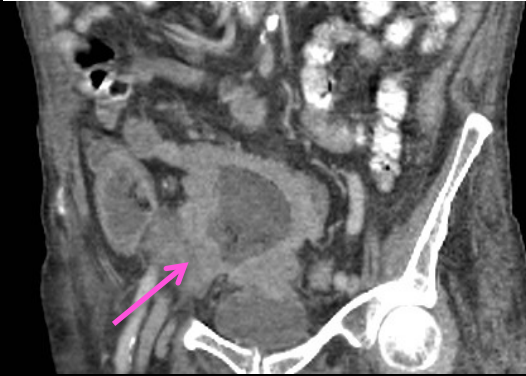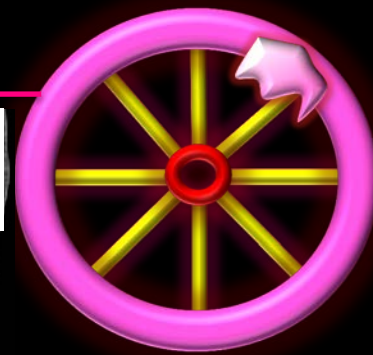

About 40% of pancreatic adenocarcinomas are unresectable at the time of initial presentation due to tumor extension along the root of the mesentery and vascular encasement.

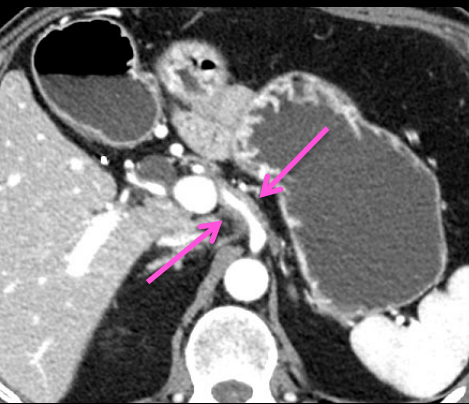

**Subtle encasement of superior mesenteric artery (SMA)**

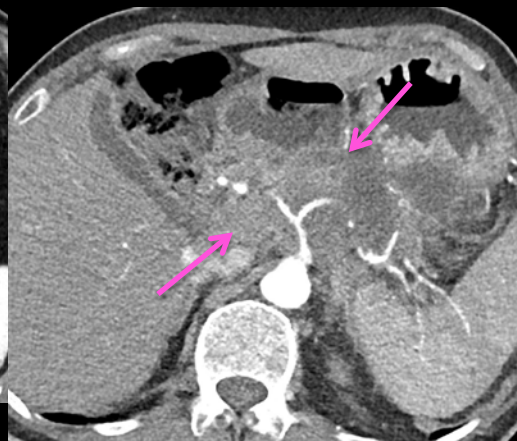

**Extensive encasement of the root of the mesentery**

GISTs are mesenchymal tumors that occur in the stomach (60%–70%), small bowel (20%–30%), colon and rectum (10%), and esophagus (<5%) and may also extend into the mesentery. Several cases of primary mesenteric GIST have been described. GISTs are typically well-circumscribed masses with central necrosis.

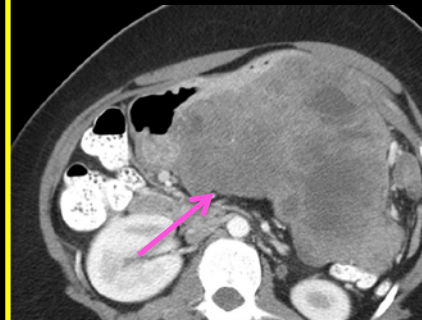

**Gastric GIST**

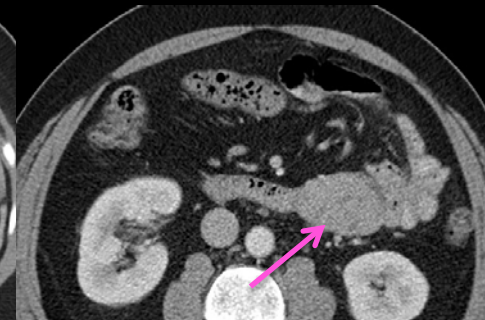

**Jejunal GIST**

# Lymphatic Spread

Lymphoma is the most common malignant neoplasm that affects the mesentery. Approximately 30%–50% of patients with non-Hodgkin lymphoma have mesenteric nodal involvement. Mesenteric lymphadenopathy may also be observed in the setting of chronic lymphocytic leukemia.

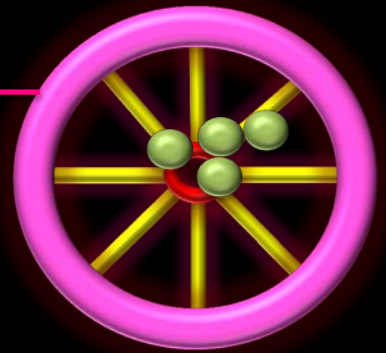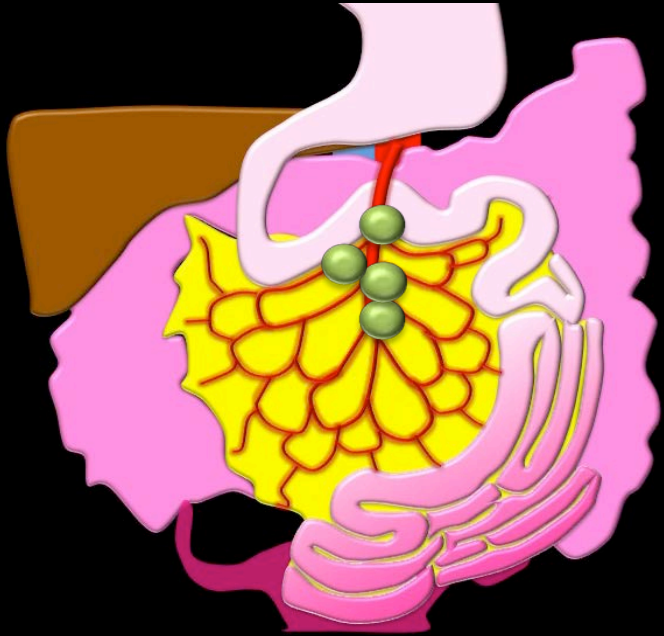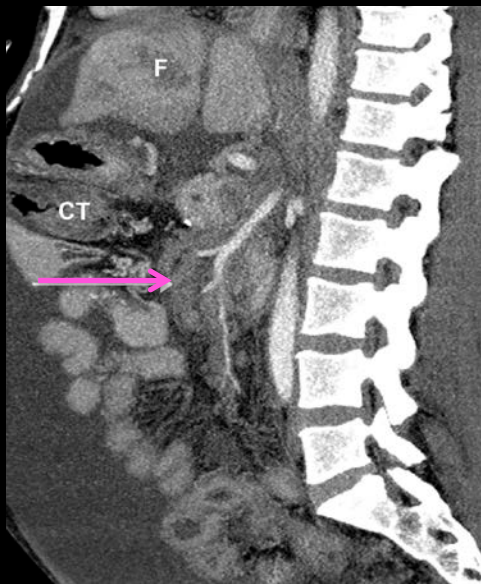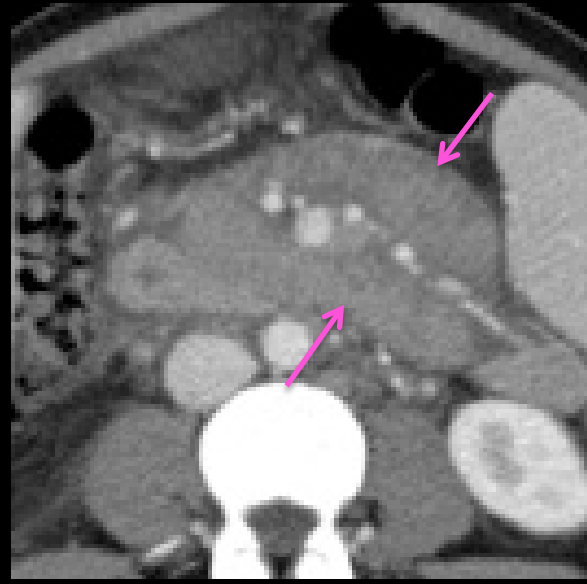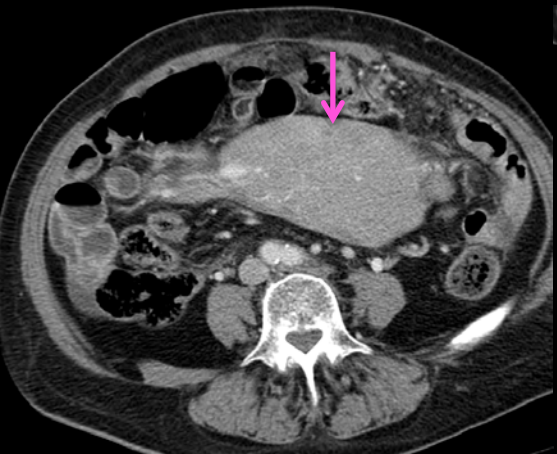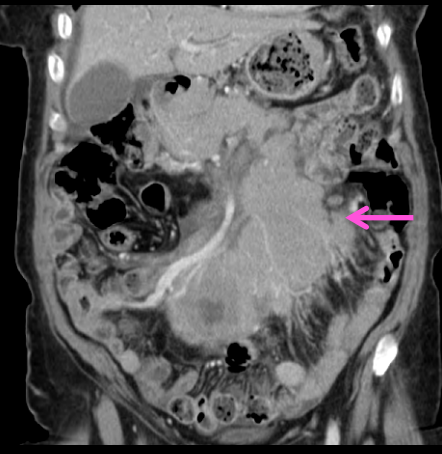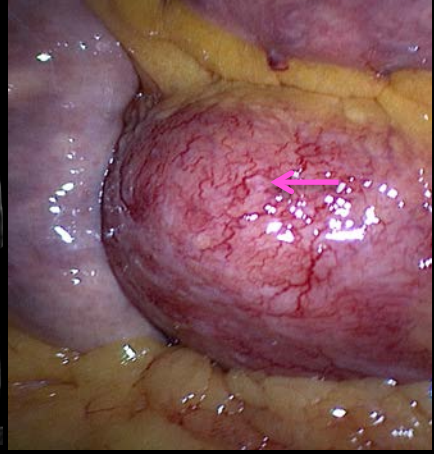

CT often demonstrates multiple rounded mildly homogeneously enhancing masses that frequently encase mesenteric vessels, known as the sandwich sign.

# Lymphatic Spread

Many tumors, including lung cancer, breast cancer, colon cancer, ovarian cancer, melanoma, and carcinoid tumors, can spread to the mesenteric lymph nodes via lymphatics.

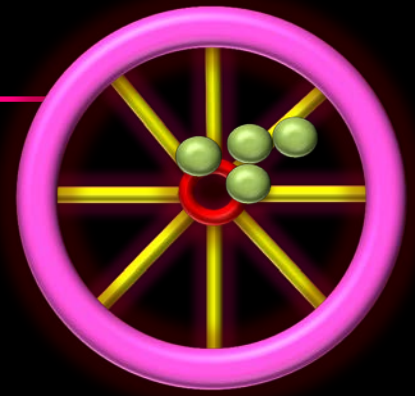

**Pearls:** Lymphoma versus nodal metastases from other primary malignancies

- In general, the degree of nodal enlargement is more pronounced and diffuse in lymphoma than in other primary malignancies, which usually present with smaller and more localized mesenteric lymph nodes.

**Newly diagnosed adenocarcinoma of the pancreas**

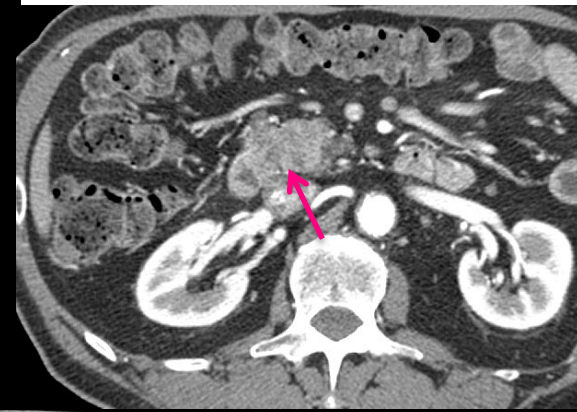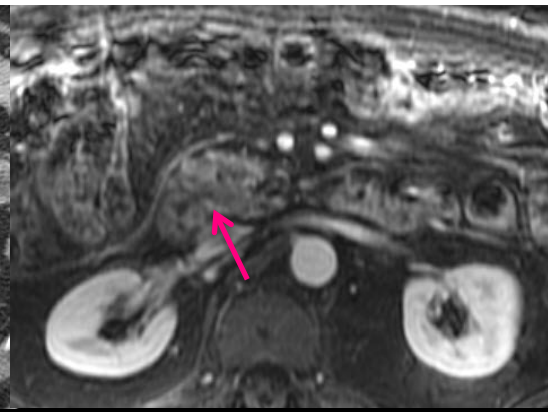

**Biopsy-proven lymphoma**

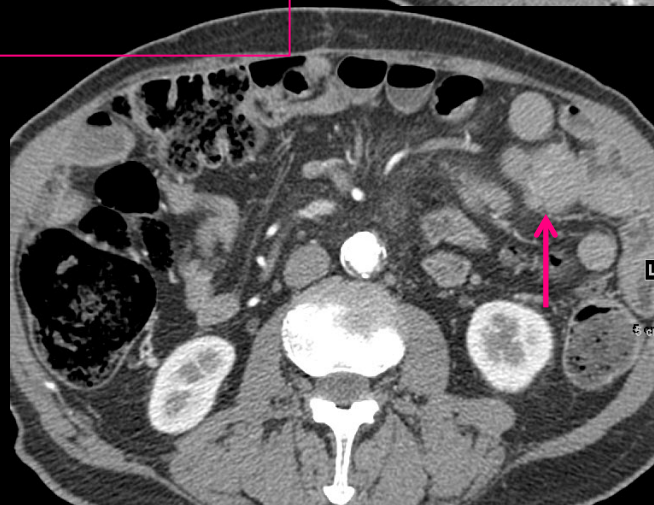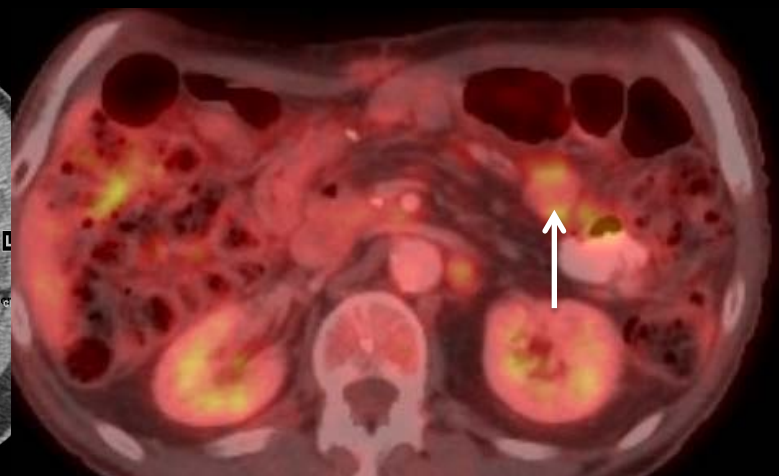

**Large mesentery lymphadenopathy with FDG avidity**

# Hematogenous Spread

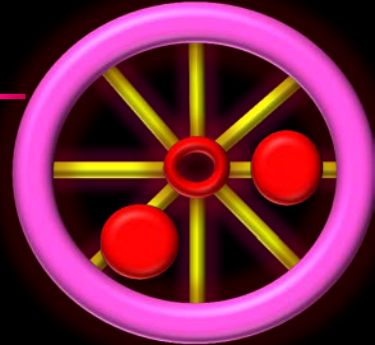

The small intestine and its mesentery are the most common sites of gastrointestinal metastases from melanoma. Breast cancer and lung cancer may also undergo hematogenous dissemination via mesenteric arterial branches.

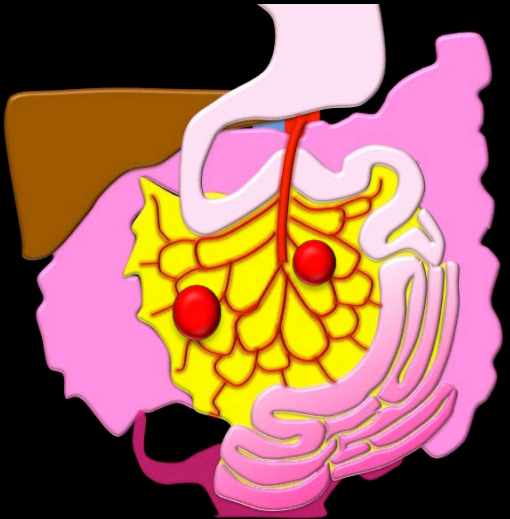

## Melanoma metastasis

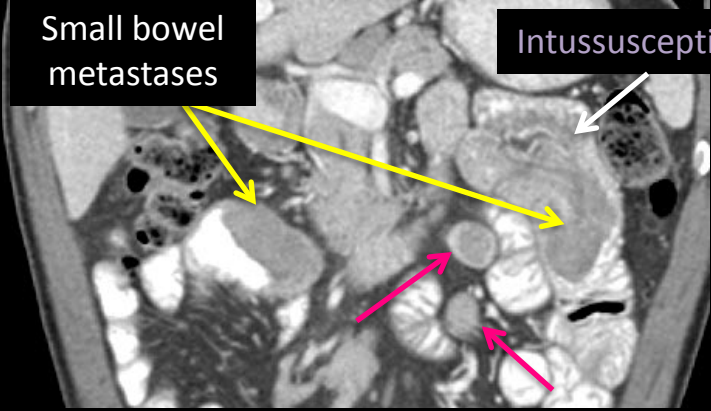

Multiple metastatic nodules in the mesentery

## Metastasis from the pancreatic carcinoid

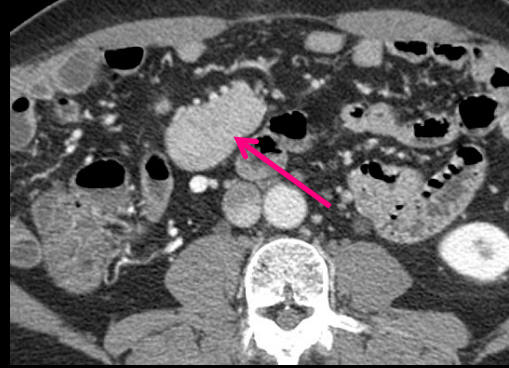

Pitfalls: Splenosis in a patient with prior posttraumatic splenectomy

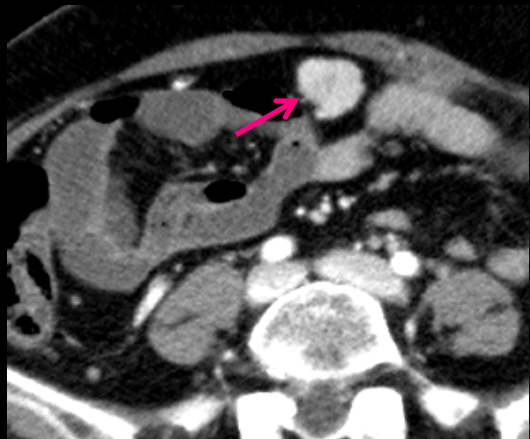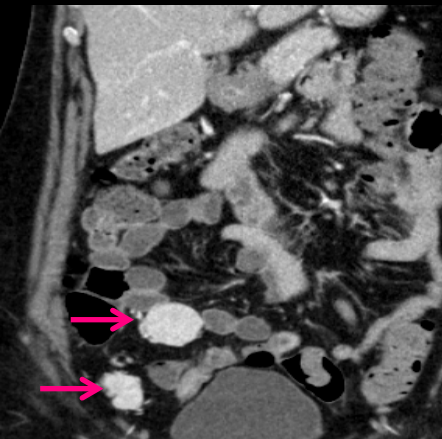

Multiple hypervascular nodules in the omentum and mesentery

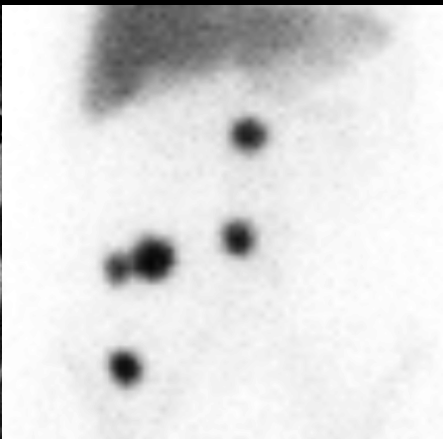

Heat-damaged red blood cell scan

# Peritoneal Seeding: Ovarian Cancer Example

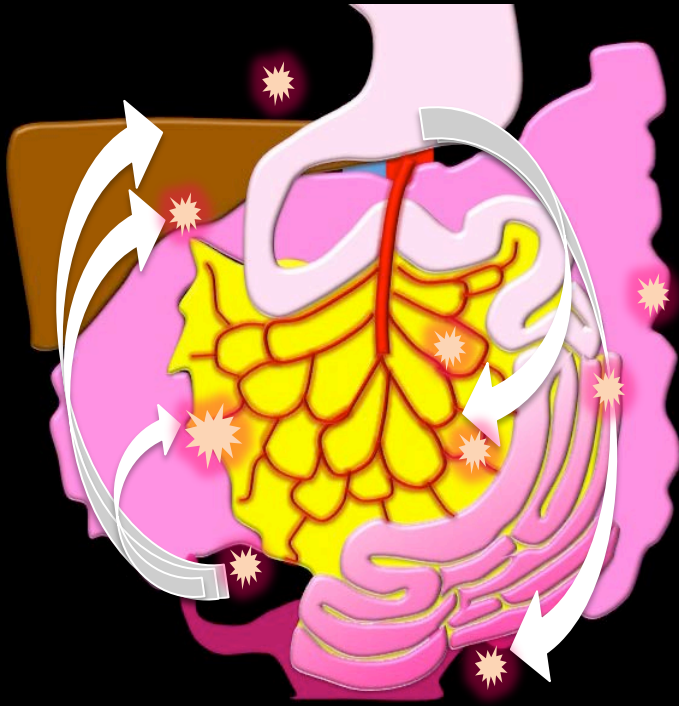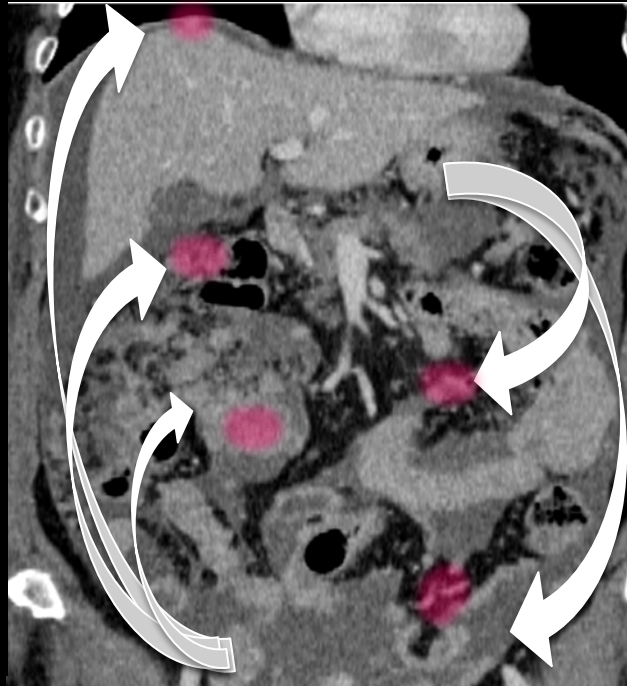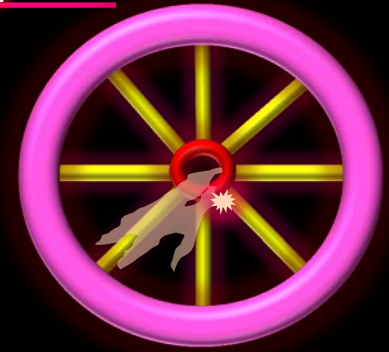

Following a clockwise route, the ascitic fluid flows from the right paracolic gutter to the Morison pouch, followed by the omental foramen and subdiaphragmatic spaces.

The route is completed when ascitic fluid travels caudally via the inframesocolic compartment into the mesentery and the pouch of Douglas.

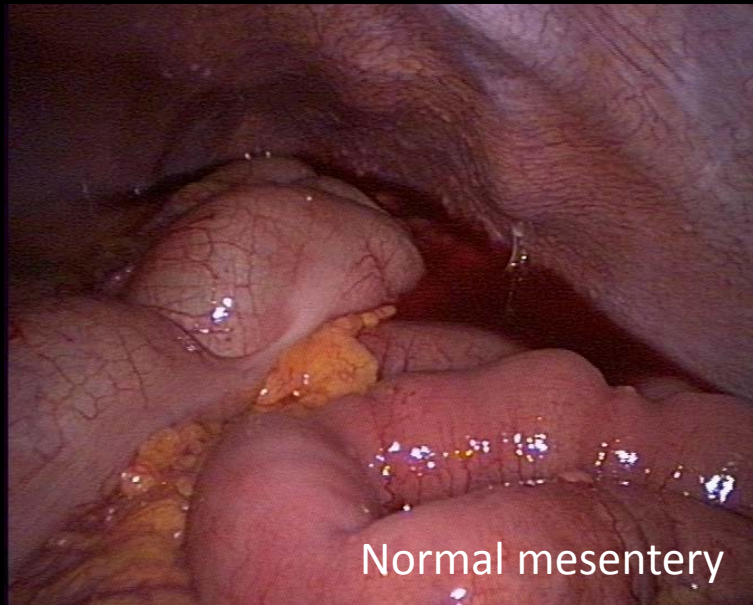

Normal mesentery

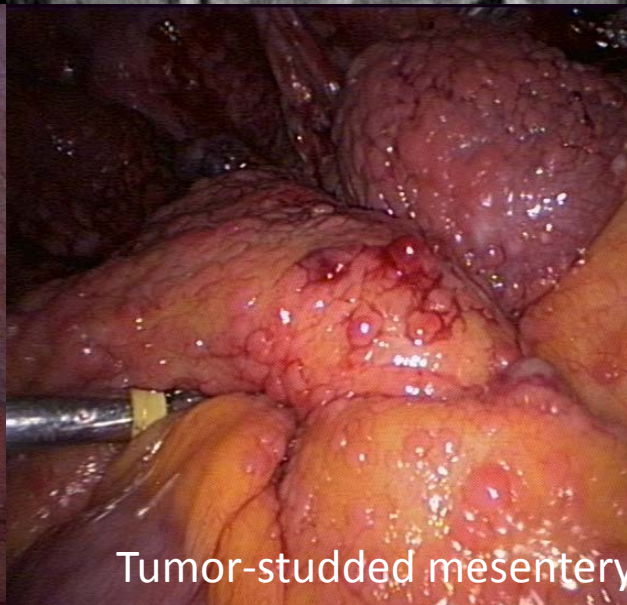

Tumor-studded mesentery

# Pattern of Peritoneal Seeding

**SMALL BOWEL INVOLVEMENT PATTERN**

**INFILTRATIVE PATTERN LEADING TO A "MISTY MESENTERY"**

**RETRACTILE PATTERN**

**NODULAR PATTERN**

The diagram illustrates four distinct patterns of peritoneal seeding. The central peritoneum is represented by a pink circular structure with yellow radial lines. Four pink arrows point from this central diagram to four different patterns, each with associated CT scans and laparoscopic images:

- SMALL BOWEL INVOLVEMENT PATTERN:** Shown in the top-left, with a CT scan and laparoscopic image highlighting the small bowel.
- INFILTRATIVE PATTERN LEADING TO A "MISTY MESENTERY":** Shown in the top-right, with a CT scan and laparoscopic image showing a hazy, infiltrated mesentery.
- RETRACTILE PATTERN:** Shown in the bottom-left, with a CT scan and laparoscopic image showing retracted, thickened peritoneum.
- NODULAR PATTERN:** Shown in the bottom-right, with a CT scan and laparoscopic image showing discrete nodules on the peritoneum.

# Infiltrative Pattern: Misty Mesentery

Misty mesentery is a subtle imaging sign of mesentery involvement. When it is observed in a patient with ovarian cancer, it may signify diffuse mesenteric involvement that would preclude optimal cytoreduction.

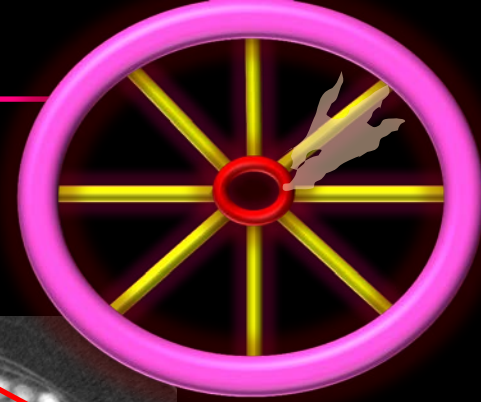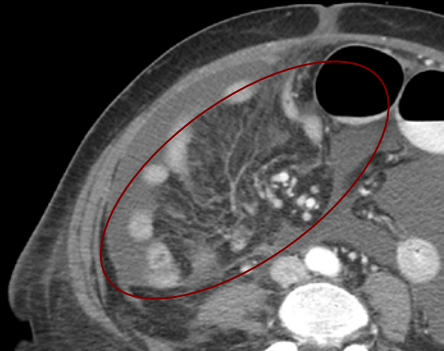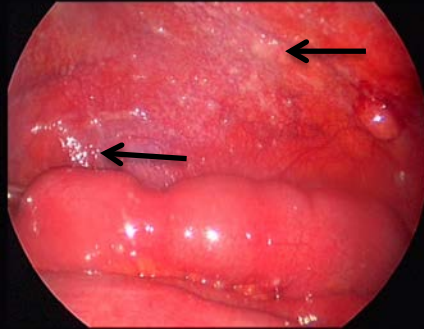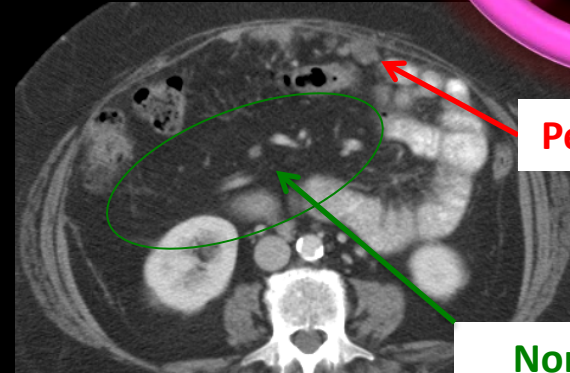

Peritoneal nodules

Normal mesentery

Subtle linear fat infiltration at CT

Pearl: loculated ascites

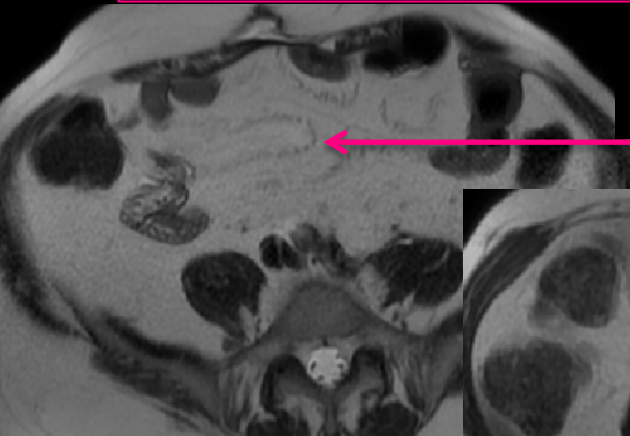

Mesenteric fat infiltration at MR

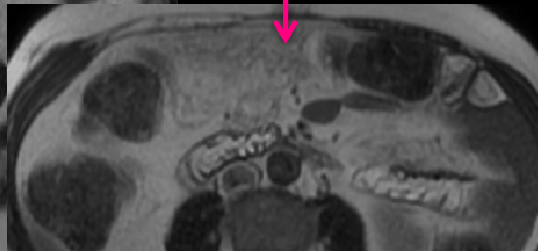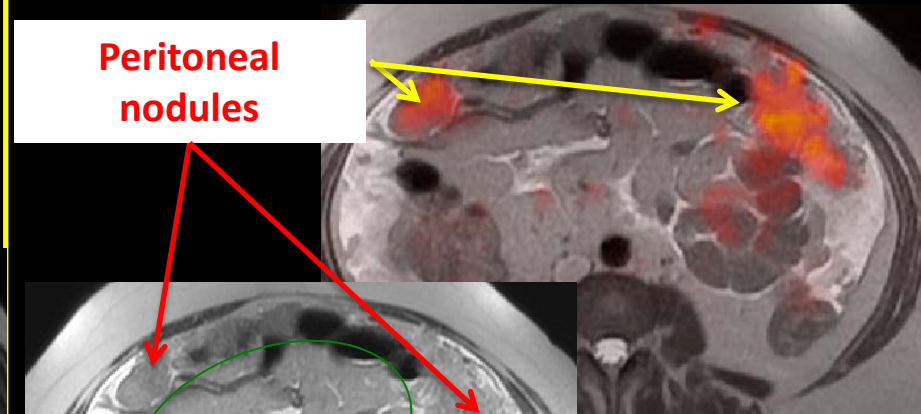

Peritoneal nodules

Normal mesentery

Pitfalls: Misty mesentery is a relatively nonspecific imaging finding. Differential considerations include mesenteric edema, lymphedema, inflammation, hemorrhage, and neoplasms.

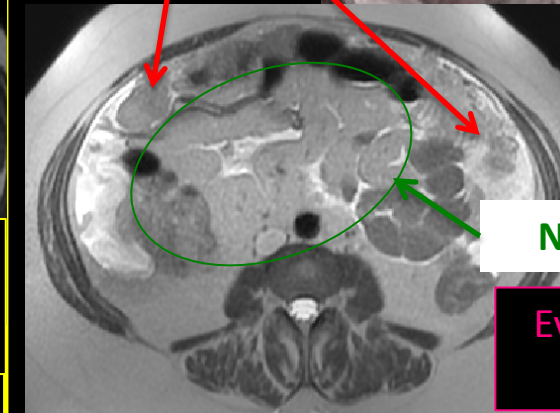

Even distribution of ascites

# Retractile Pattern

Retractile pattern is evident as **small bowel retraction, angulation, and kinking**. Small bowel edema and/or thickening may be present secondary to the ischemia and/or vascular congestion, or invasion of the serosa. Mesenteric tumor nodules may not be apparent, and retraction may be the only sign of severe mesenteric involvement.

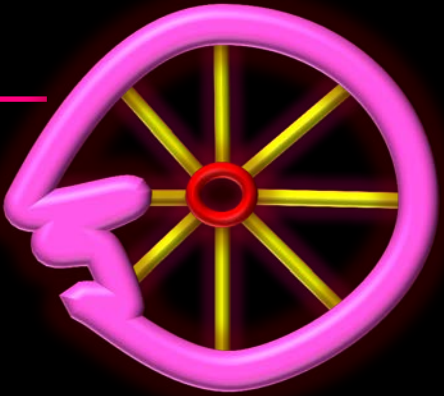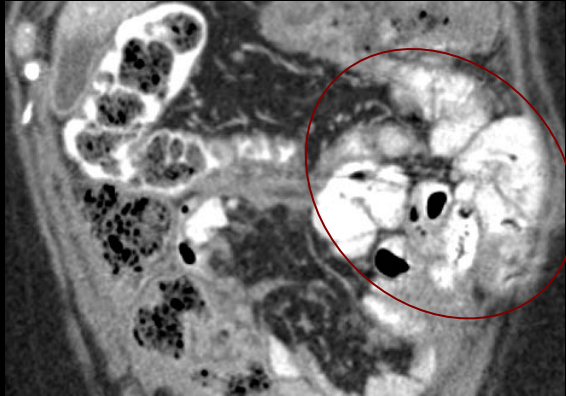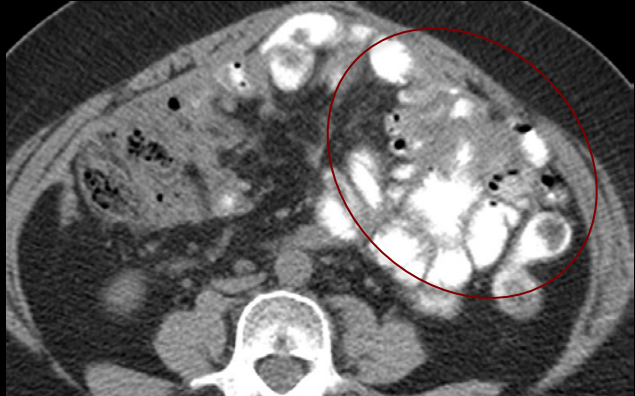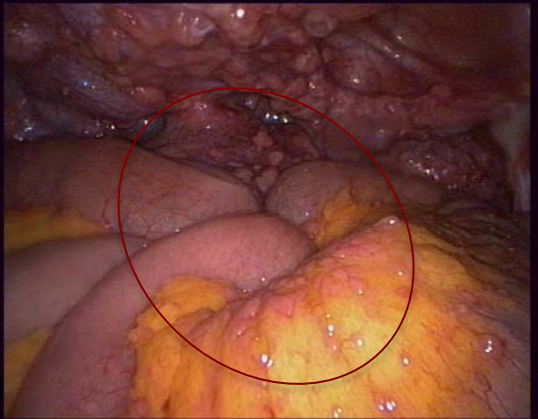

Clumping and retraction of small bowel loops

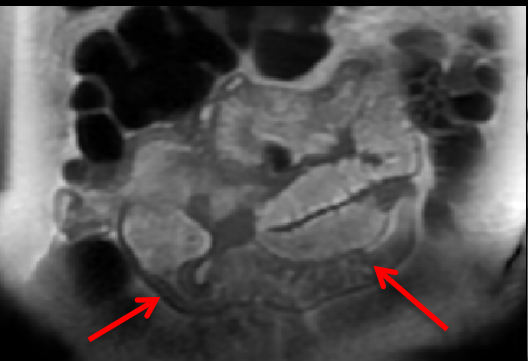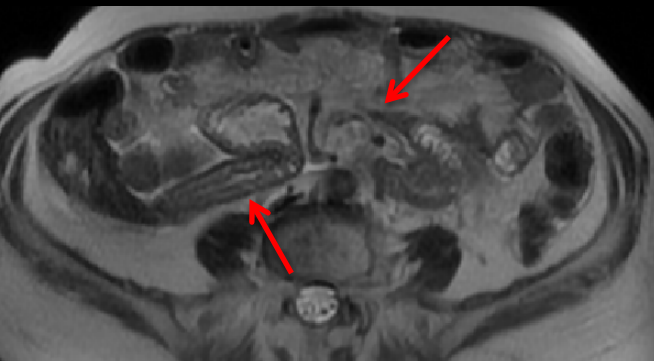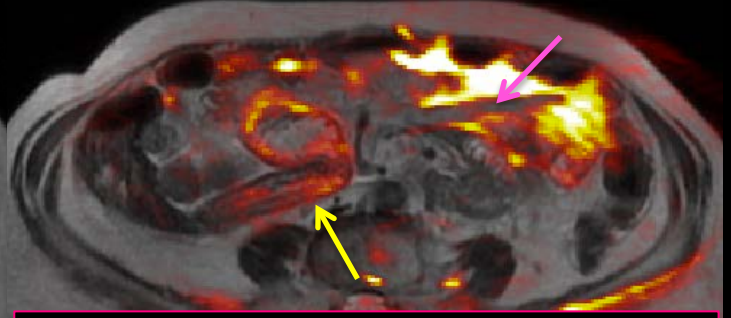

**Small bowel wall thickening, angulation, and kinking consistent with mesenteric infiltration. No discrete tumor nodules are seen.**

**DW imaging may show restricted diffusion in the bowel serosa consistent with diffuse neoplastic involvement.**



# Nodular Pattern

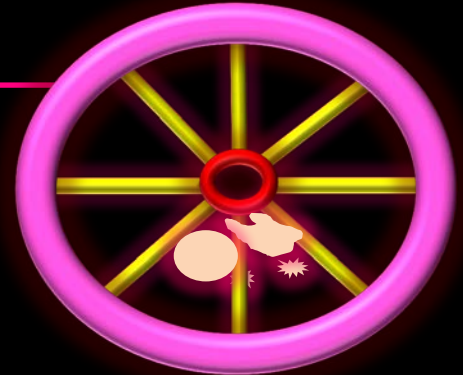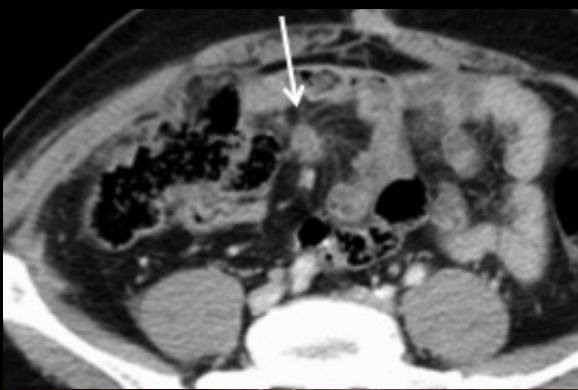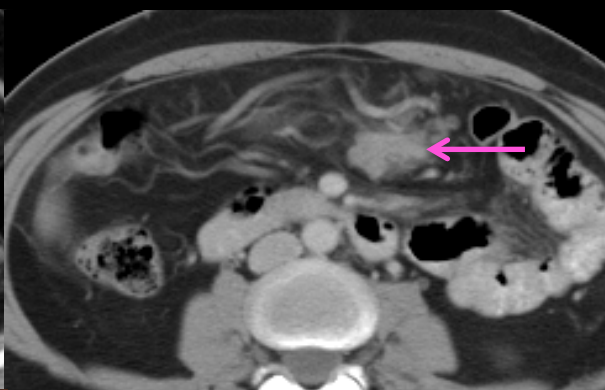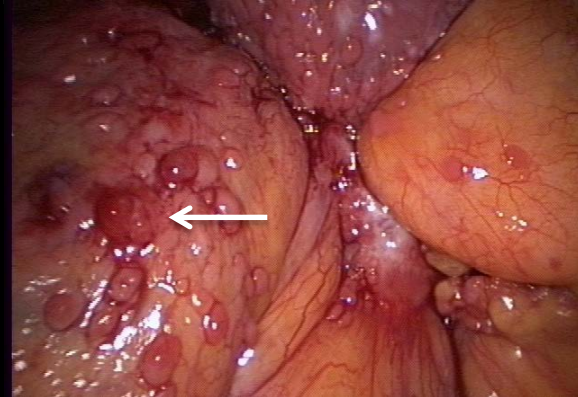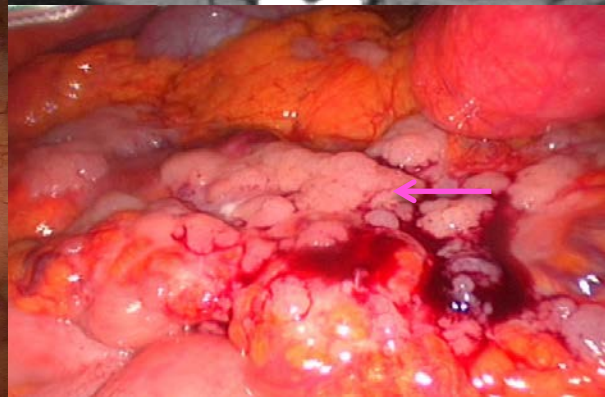

Pitfalls: Normal lymph nodes

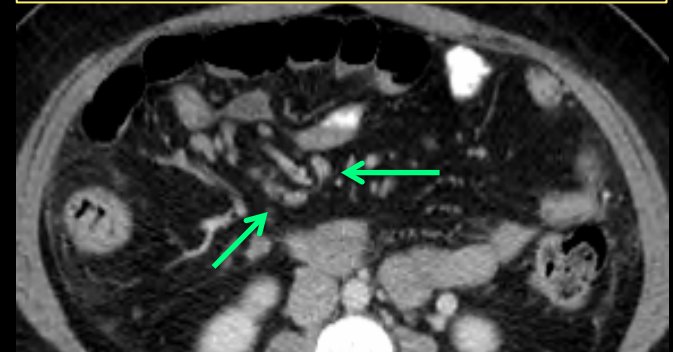

Normal lymph nodes (oblong shape)  
**Nodular implants have more rounded shape or spiculated borders**

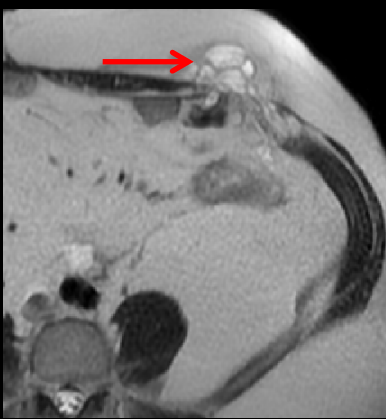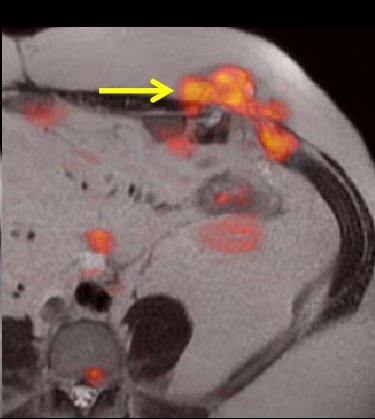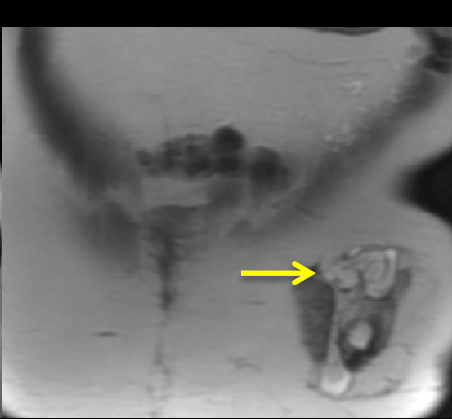

Mesentery implant in the incisional hernia

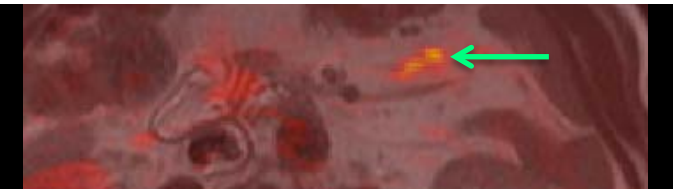

DW imaging is not helpful because all lymph nodes demonstrated restricted diffusion.

# Small Bowel Involvement Pattern

This pattern is usually present in advanced disease. Nodules may involve just the serosa or the entire thickness of the intestinal wall.

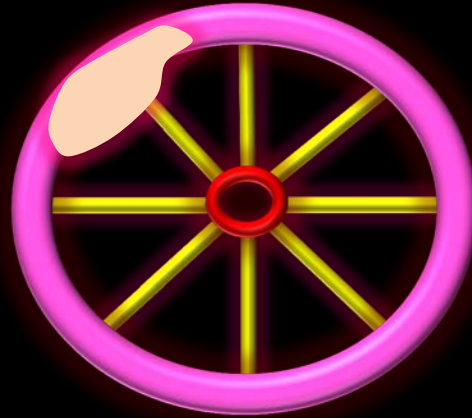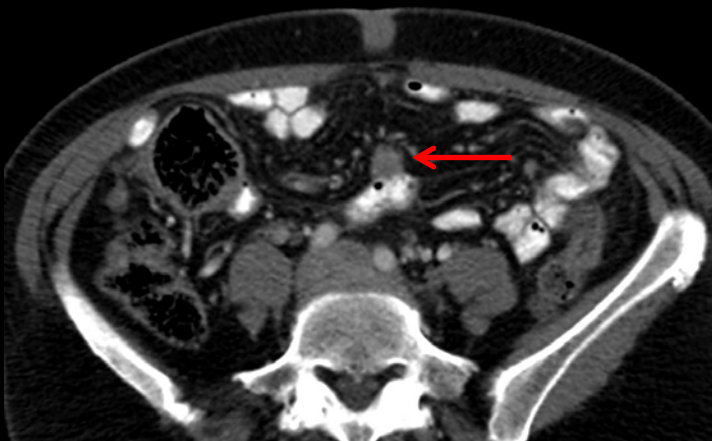

Serosal tumor deposit

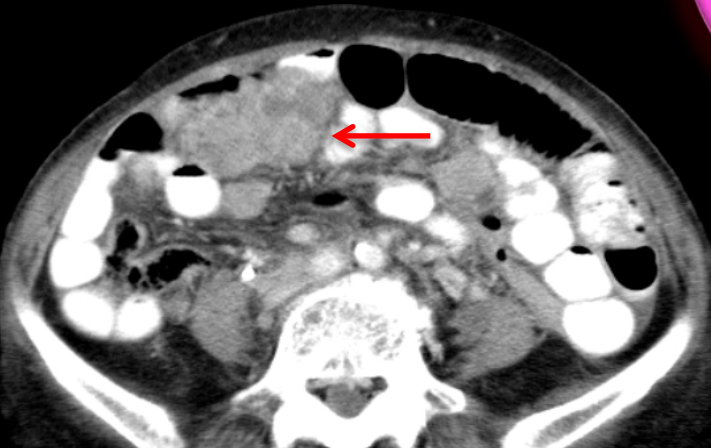

Tumor implant with full-thickness bowel wall involvement

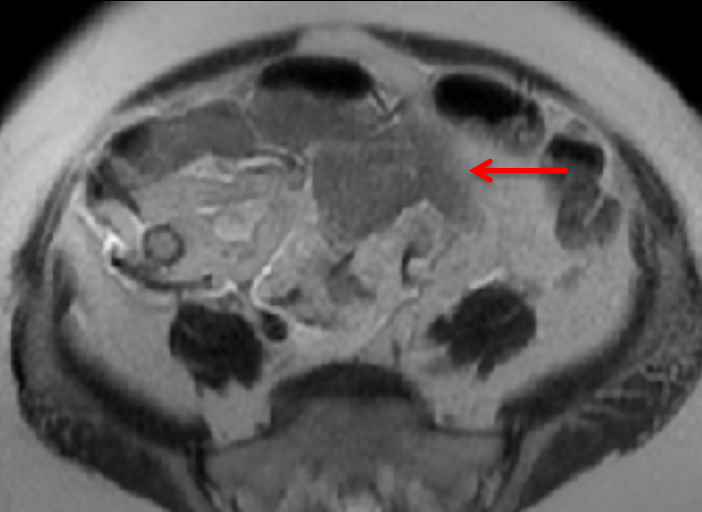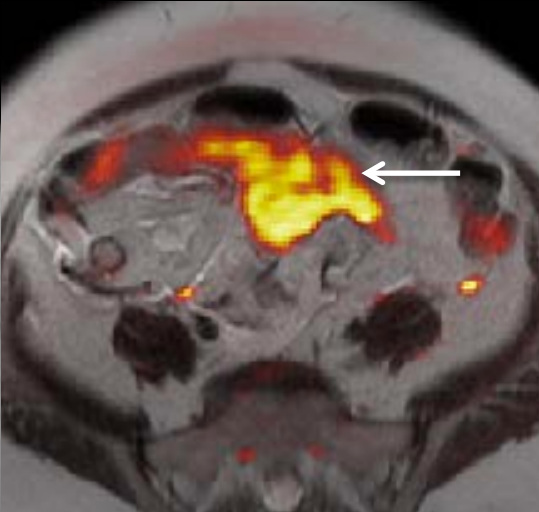

Large mesenteric implant with small bowel invasion

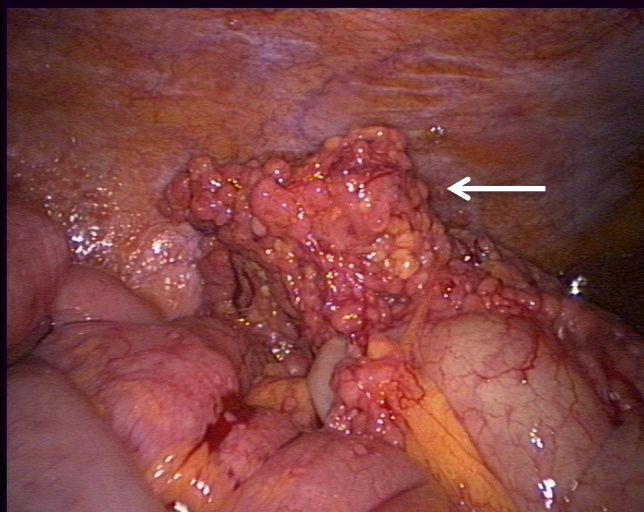

# DIAGNOSE TUMOR-RELATED COMPLICATIONS

Complications caused by the mesenteric tumor extension into the adjacent structures:

## Adjacent Vessels

- Compression
- Erosion
- Invasion
- Thrombus

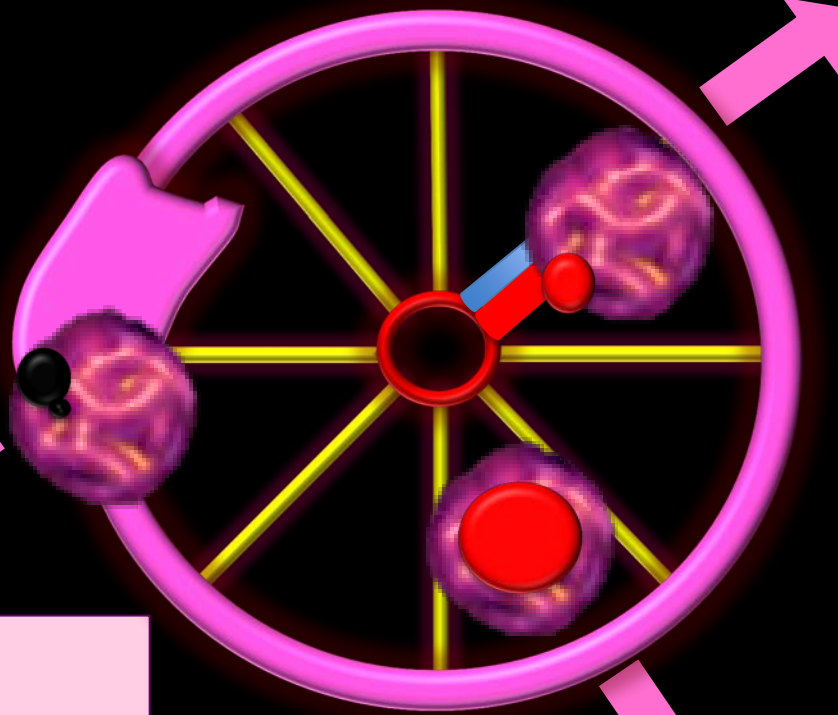

## Small Bowel Complications:

- Obstruction
- Perforation
- Tumor-related fistula or abscess formation
- Ischemia

Intratumoral hemorrhage

# Intratumoral Bleeding

Some tumors may spontaneously rupture and manifest with intratumoral hemorrhage.

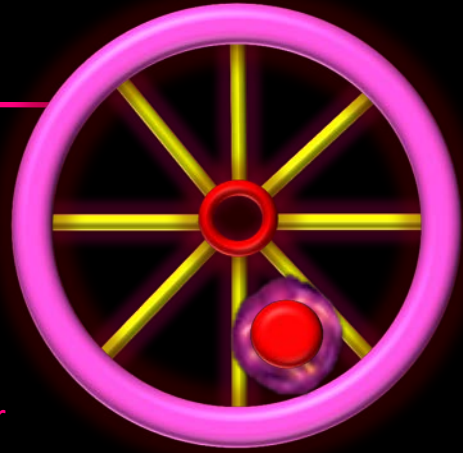

## Lymphoma

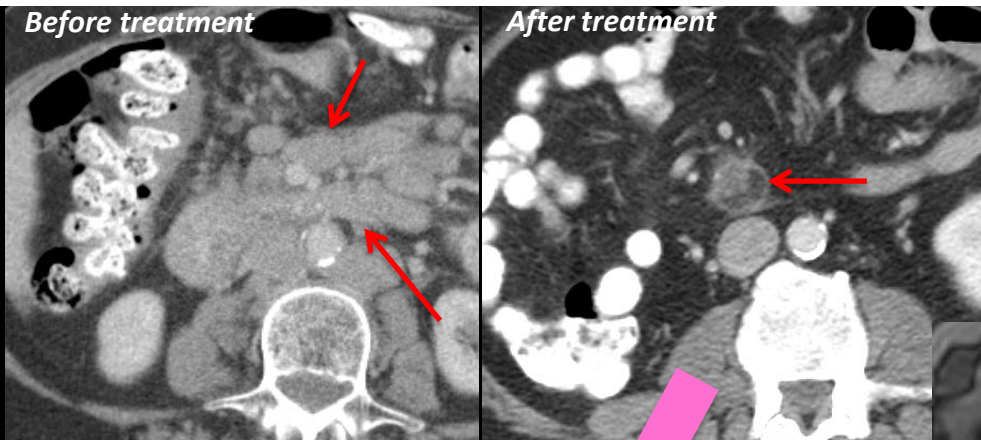

Interval resolution of prior lymphadenopathy

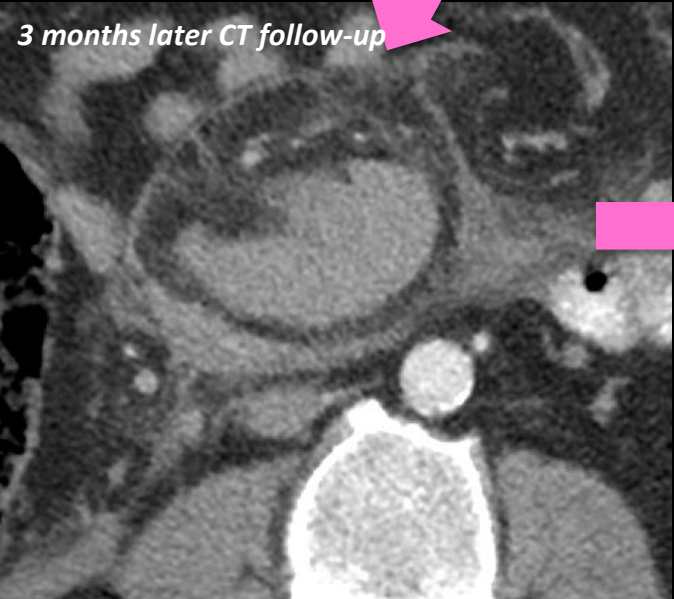

New onset of abdominal pain and a clinical concern for tumor recurrence

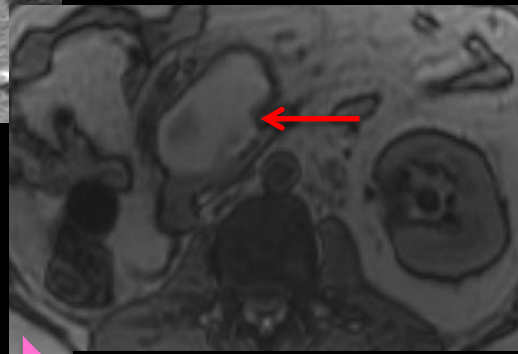

T1-hyperintense

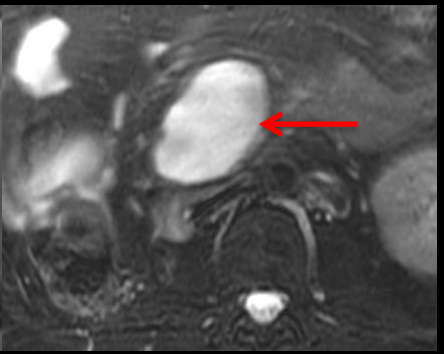

T2-hyperintense

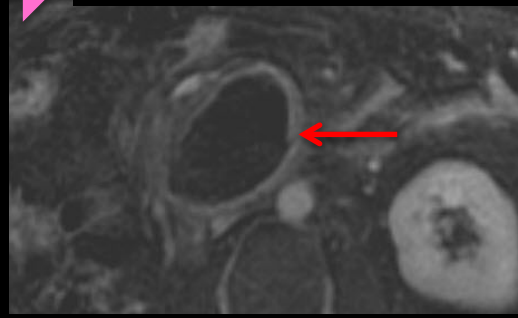

No enhancement

**Hematoma**

# Small Bowel Complications

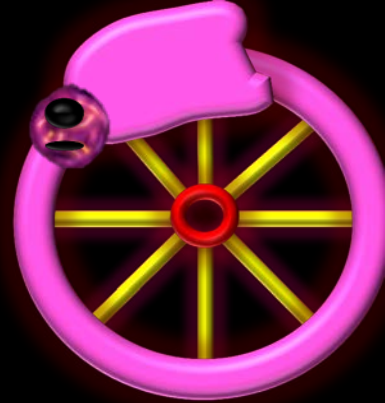

## Mesenteric metastasis from hemangiopericytoma

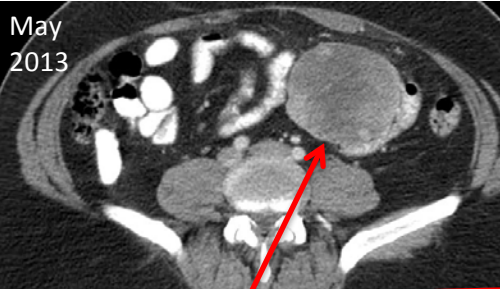

Interval tumor growth

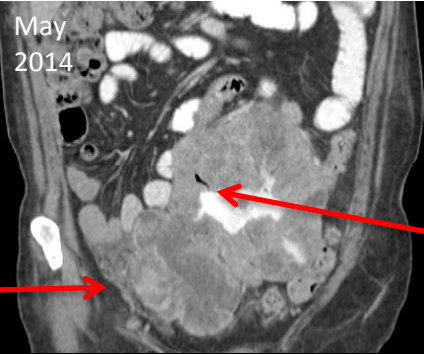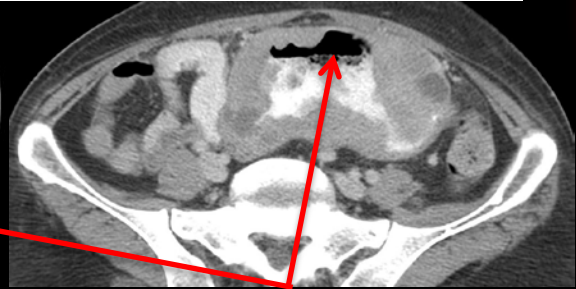

New air bubble: fistula

**Pearl: New air bubble in the tumor should raise suspicion for a tumor-related fistula. However, a fistulous tract may not always be visible.**

## Desmoid Tumor

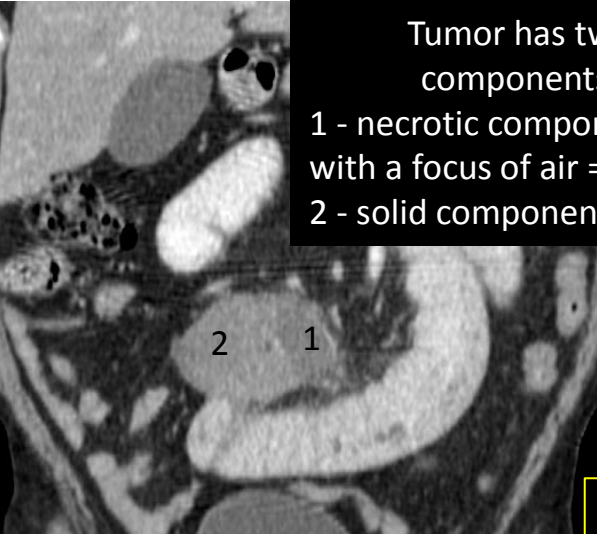

Tumor has two components:  
 1 - necrotic component with a focus of air = abscess  
 2 - solid component

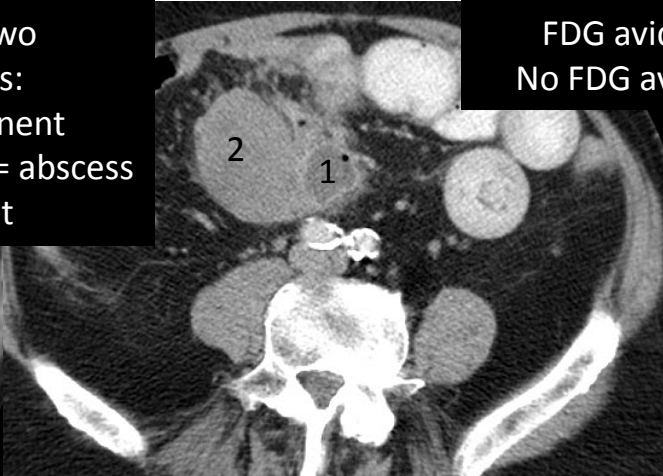

FDG avidity in 1  
 No FDG avidity in 2

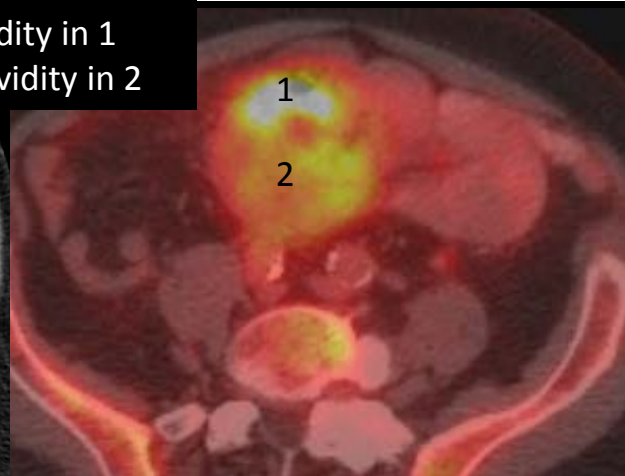

Small bowel obstruction

**Desmoid tumor with a fistula to the small bowel and abscess formation. Prominent FDG avidity in the abscess, not in the tumor.**

# Small Bowel Complications

## Carcinoid tumor

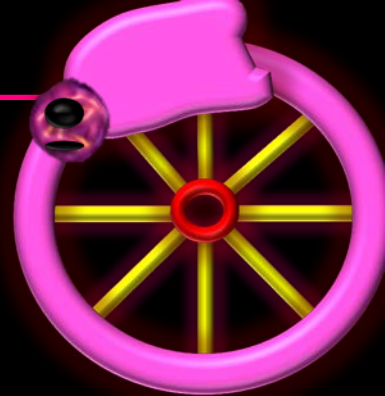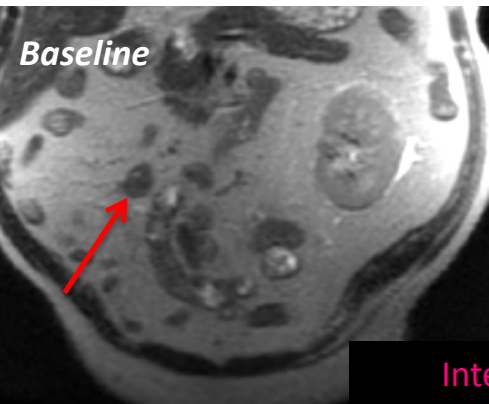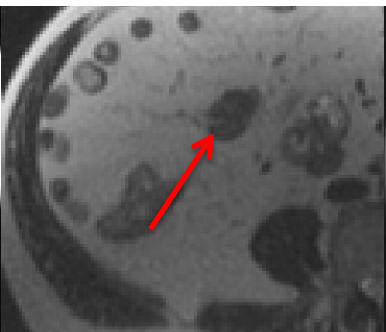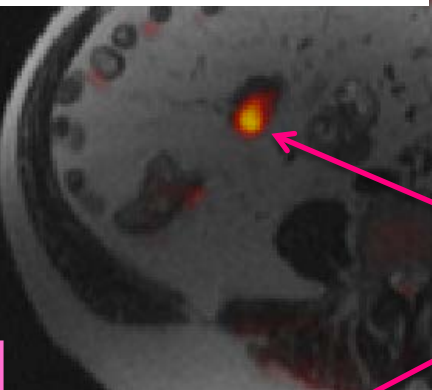

Pearl: Carcinoid tumors demonstrate restricted diffusion and FDG avidity.

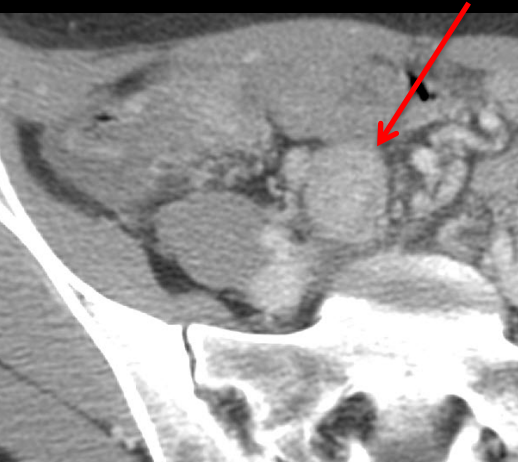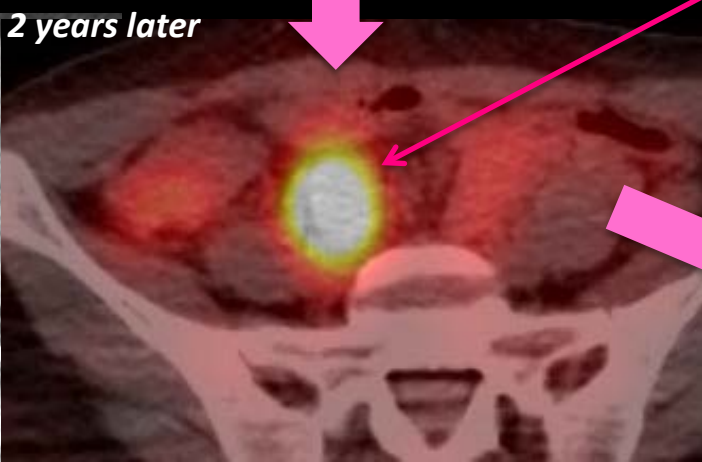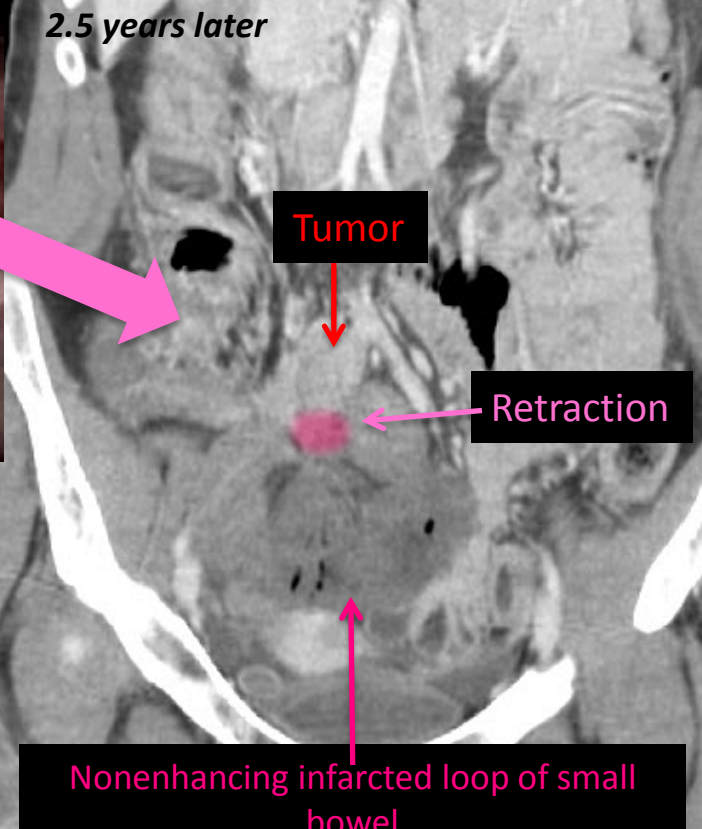

Mesenteric infiltration and adjacent mesenteric fibrosis may result in intestinal ischemia or infarction. Images should be scrutinized for any signs of bowel ischemia.

# Vascular Complications

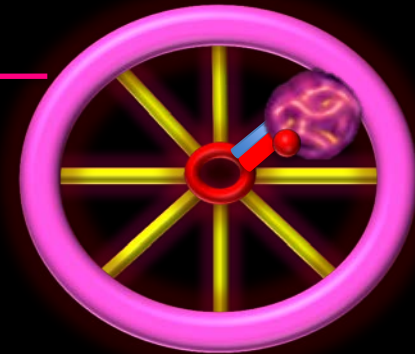

Blood vessels may be compressed, thrombosed, or eroded by the adjacent tumor.

## Pancreatic cancer with extension into the root of the mesentery

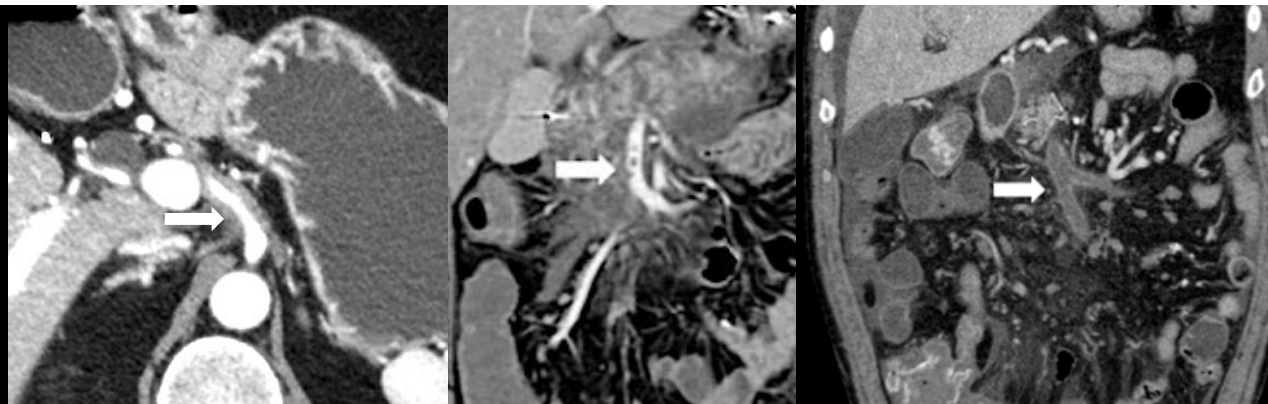

Encasement

SMA thrombus

Superior mesenteric vein (SMV) thrombus

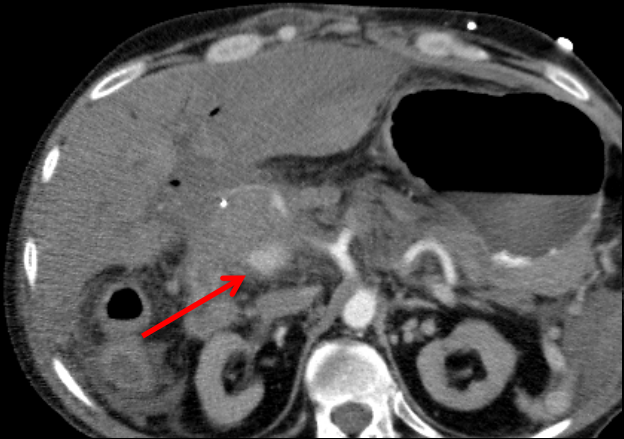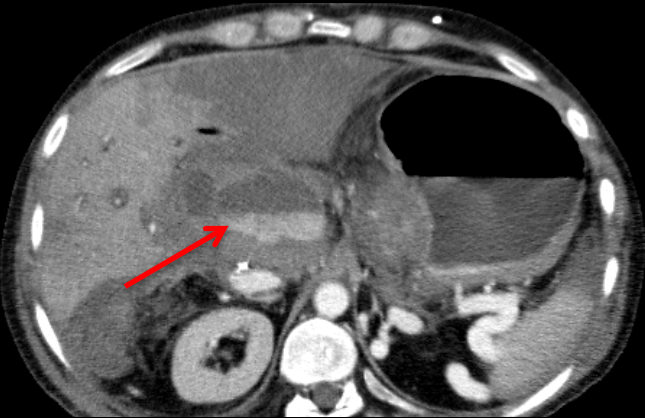

Common hepatic artery encasement by tumor and active contrast extravasation consistent with hemorrhage after a Whipple procedure

Pitfalls: Not every enhancing lesion in the root of the mesentery is a tumor.

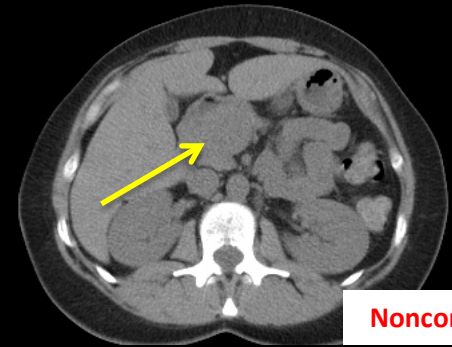

Noncontrast

SMV aneurysm

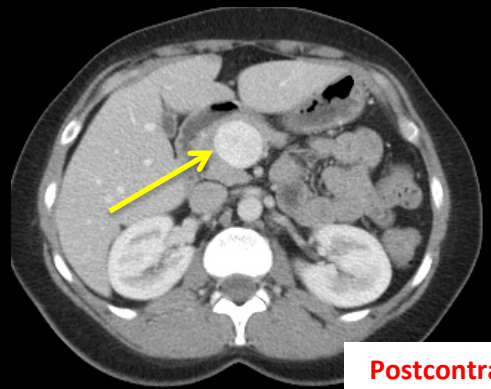

Postcontrast

# TREATMENT AND MANAGEMENT

## IMAGING ASSESSMENT OF TUMOR RESECTABILITY

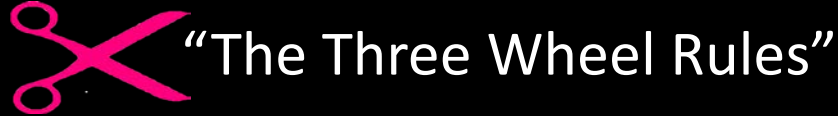

### 1 R0 rules

Complete resection

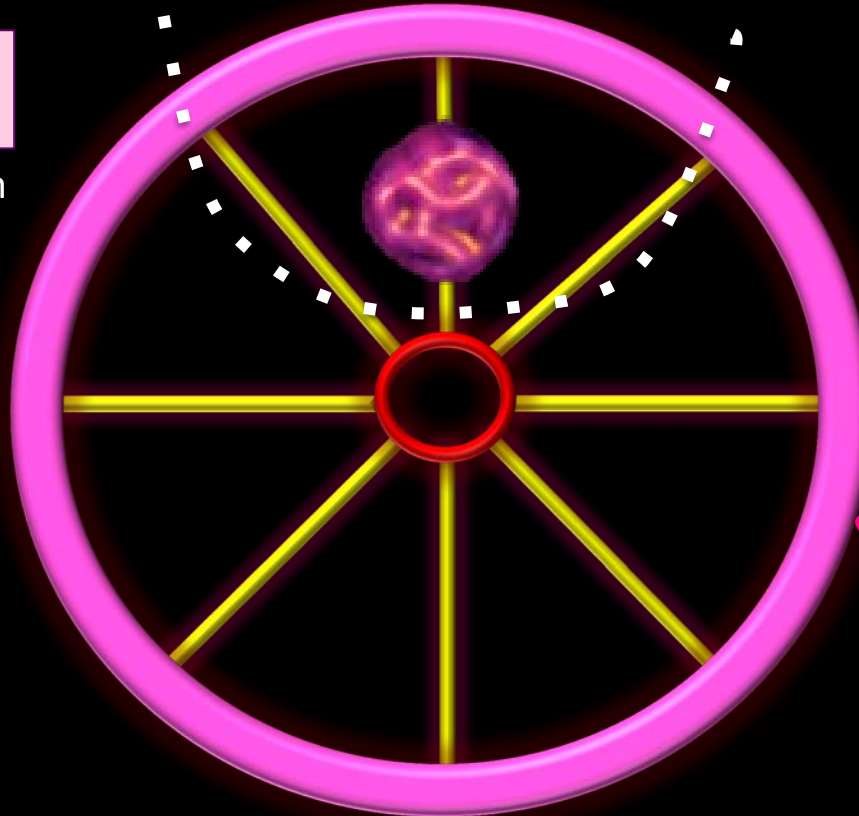

### 2 Tumor location

- Peripheral location: higher rate of successful surgical resection because less extensive small bowel resection is required.
- Central location: Lower chance of successful excision because more extensive intestinal resection is needed.

### 3 Mesenteric vessels

Central tumors impose a greater surgical challenge as they may involve large centrally located vessels that supply large vascular territories and cannot be sacrificed.



# TREATMENT AND MANAGEMENT

## SURGICAL

## DEBATABLE SURGERY

## NONSURGICAL

B  
E  
N  
I  
G  
N

Cystic lymphangioma  
Solidary fibrous tumor  
Desmoid tumors (high risk of recurrence)  
Lipoma or lipoblastoma

Lymphoma

Complicated Sclerosing  
Mesenteritis

Sclerosing mesenteritis

M  
A  
L  
I  
G  
N  
A  
N  
T

R0 PRIMARY GOAL

Liposarcoma  
GIST  
Ovarian carcinomatosis  
Carcinoid

R1 (cytoreductive surgery)

Ovarian carcinomatosis  
Carcinoid

Secondary neoplasms  
Ovarian carcinomatosis

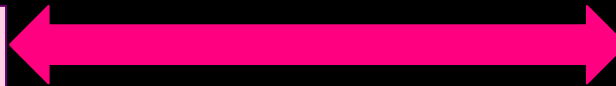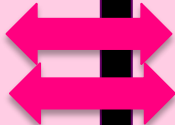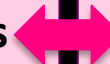

# Management of Ovarian Carcinomatosis

## SURGICAL

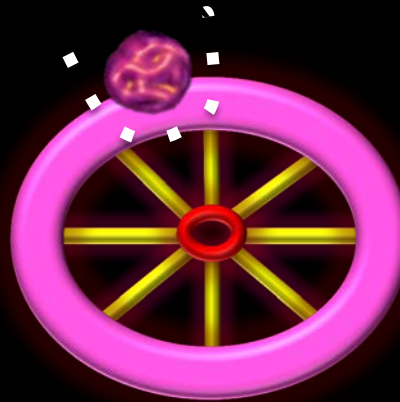

Limited number of small bowel serosal implants located on the antimesenteric border can be resected.

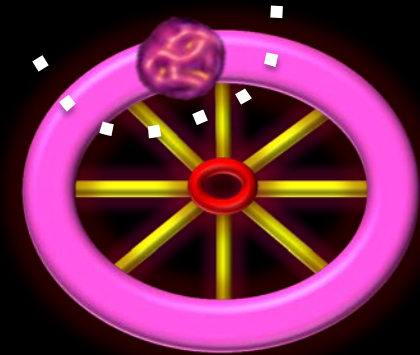

Limited number of implants with small bowel invasion can be resected, but this entails larger intestinal resection.

## NONSURGICAL

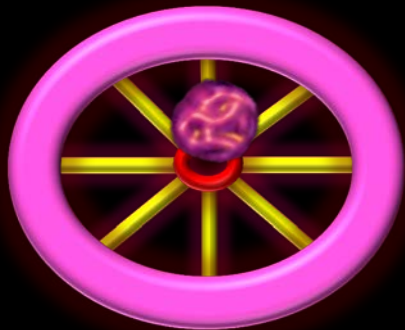

Centrally situated tumors require more extensive intestinal resection.

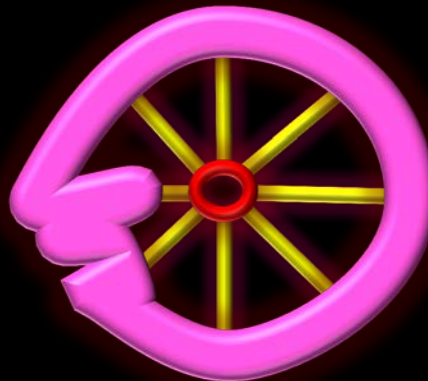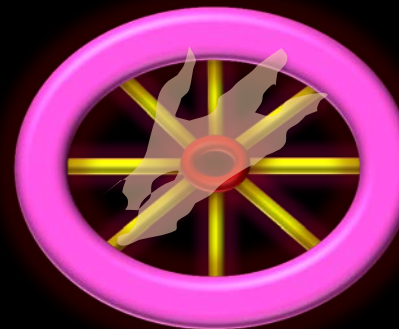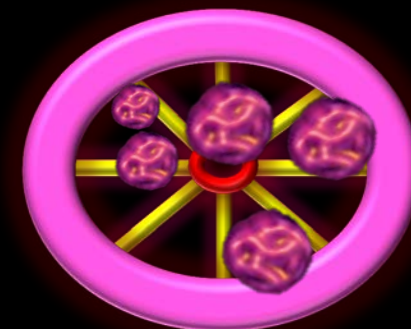

Misty mesentery, retractile mesentery, and multiple mesenteric nodules are all signs of diffuse mesenteric involvement, ruling out surgical management.

# CONCLUSIONS

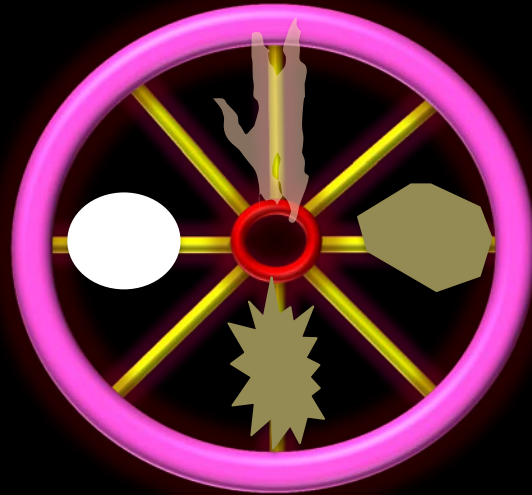

**PRIMARY  
MESENTERIC LESIONS:**  
Rare  
Four patterns  
Goal: R0 resection

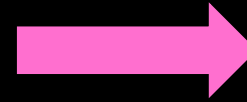

**MORE COMMON:**  
Desmoid  
Sarcoma  
Lymphangioma  
Carcinoid (Primary)

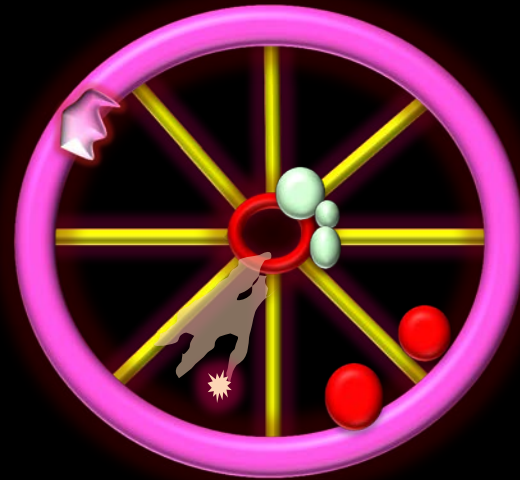

**SECONDARY MESENTERIC  
LESIONS:**  
Common  
Four patterns  
Detection is essential

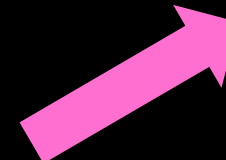

**LYMPHOMA:**  
Chemotherapy

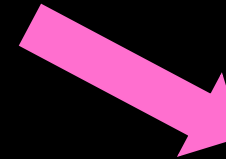

**SECONDARY  
NEOPLASM:**  
Usually  
nonsurgical  
management

# Suggested Reading

1. Coakley FV, Hricak H. *Imaging of peritoneal and mesenteric disease: key concept for the clinical radiologist*. Clin Radiol. 1999 Sep;54(9):563-574.
2. Forstner R, Sala E, Kinkel K, Spencer JA; European Society of Urogenital Radiology. *ESUR guidelines: ovarian cancer staging and follow-up*. Eur Radiol. 2010 Dec;20(12):2773-2780.
3. Fujii S, Matsusue E, Kanasaki Y, Kanamori Y, Nakanishi J, Sugihara S, Kigawa J, Terakawa N, Ogawa T. *Detection of peritoneal dissemination in gynecological malignancy: evaluation by diffusion-weighted MR imaging*. Eur Radiol. 2008 Jan;18(1):18-23.
4. Horton KM, Lawler LP, Fishman EK. *CT findings in sclerosing mesenteritis (panniculitis): spectrum of disease*. RadioGraphics. 2003 Nov-Dec;23(6):1561-1567.
5. Levy AD, Sobin LH. *From the archives of the AFIP: Gastrointestinal carcinoids: imaging features with clinicopathologic comparison*. RadioGraphics. 2007 Jan-Feb;27(1):237-257.
6. Nougaret S, Addley HC, Colombo PE, Fujii S, Al Sharif SS, Tirumani SH, Jardon K, Sala E, Reinhold C. *Ovarian carcinomatosis: how the radiologist can help plan the surgical approach*. RadioGraphics. 2012 Oct;32(6):1775-1800.
7. Qayyum A, Coakley FV, Westphalen AC, Hricak H, Okuno WT, Powell B. *Role of CT and MR imaging in predicting optimal cytoreduction of newly diagnosed primary epithelial ovarian cancer*. Gynecol Oncol. 2005 Feb;96(2):301-306.
8. Scarsbrook AF, Ganeshan A, Statham J, Thakker RV, Weaver A, Talbot D, Boardman P, Bradley KM, Gleeson FV, Phillips RR. *Anatomic and functional imaging of metastatic carcinoid tumors*. RadioGraphics. 2007 Mar-Apr;27(2):455-477.
9. Sheth S, Horton KM, Garland MR, Fishman EK. *Mesenteric neoplasms: CT appearances of primary and secondary tumors and differential diagnosis*. RadioGraphics. 2003 Mar-Apr;23(2):457-473.
10. Faria SC, Iyer RB, Rashid A, Ellis L, Whitman GJ. *Desmoid tumor of the small bowel and the mesentery*. AJR Am J Roentgenol. 2004 Jul;183(1):118.
11. Takagi Y, Yasuda K, Nakada T, Abe T, Saji S. *Small bowel volvulus caused by a lipoma of the mesentery showing a distinct pattern on preoperative computed tomography*. Dis Colon Rectum. 1998 Jan;41(1):122-123.
12. Tomita H, Yamaguchi K, Matsuo M, Ohno T, Nishimoto Y, Hirose Y. *Metastatic myxoid liposarcoma in the mesentery: what is debated? Case report and a review of the literature*. Am Surg. 2006 Jan;72(1):68-70.
13. Tomizawa Y, Garner K, Sohnen A. *Lymphangioma of the small bowel mesentery: a rare intra-abdominal tumor causing anemia*. Clin Gastroenterol Hepatol. 2013 Aug;11(8):e57.
14. McLaughlin PD, Filippone A, Maher MM. *The misty mesentery: mesenteric panniculitis and its mimics*. AJR Am J Roentgenol. 2013 Feb;200(2):W116-W123.
15. Taffel MT, Khati NJ, Hai N, Yaghmai V, Nikolaidis P. *De-misty-fying the mesentery: an algorithmic approach to neoplastic and non-neoplastic mesenteric abnormalities*. Abdom Imaging. 2014 Aug;39(4):892-907.
